# Supplementary material for: [18]Annulene put into a new perspective
Source: Royal Society of Chemistry journal article supplement (doi:10.1039/c6cc01309k), 2016-01-01
Supplement: c6cc01309k1.pdf [file c6cc01309k1.pdf]

## Electronic Supporting Information

### [18]Annulene put into new perspective

Dominik Lungerich,<sup>a</sup> Alexey V. Nizovtsev,<sup>b</sup> Frank W. Heinemann,<sup>b</sup> Frank Hampel,<sup>a</sup> Karsten Meyer,<sup>b</sup> George Majetich,<sup>c</sup> Paul v. R. Schleyer,<sup>c</sup> and Norbert Jux<sup>\*a</sup>

<sup>a</sup>*\*Department Chemie und Pharmazie & Interdisciplinary Center for Molecular Materials (ICMM), Organic Chemistry II, Friedrich-Alexander-Universität Erlangen-Nürnberg, Henkestr.42, 91054 Erlangen (Germany).*

<sup>b</sup>*Department Chemie und Pharmazie, Inorganic Chemistry, Friedrich-Alexander-Universität Erlangen-Nürnberg, Egerlandstr. 1, 91058 Erlangen (Germany).*

<sup>c</sup>*Department of Chemistry, University of Georgia, 140 Cedar St, Athens GA 30602 (USA).*

## Table of Content

|                                                                                                      |            |
|------------------------------------------------------------------------------------------------------|------------|
| <b>1. General information</b>                                                                        | <b>S2</b>  |
| <b>2. Experimental procedures</b>                                                                    | <b>S3</b>  |
| (3Z)-1,6-Trimethylsilyl-hexa-3-ene-1,5-diyne (6)                                                     | <b>S3</b>  |
| 1,3,7,9,13,15-Hexadehydro-[18]annulene (5)                                                           | <b>S4</b>  |
| [18]Annulene (1)                                                                                     | <b>S5</b>  |
| <b>3. Additional experimental results</b>                                                            | <b>S6</b>  |
| Coupling of TMS-acetylene and 1,2-dichloroethene to (3Z)-1,6-trimethylsilyl-hexa-3-ene-1,5-diyne     | <b>S6</b>  |
| Deprotection of (3Z)-1,6-trimethylsilyl-hexa-3-ene-1,5-diyne and coupling to hexadehydro[18]annulene | <b>S7</b>  |
| Oxidative coupling to hexadehydro[18]annulene by variation of the Cu-system                          | <b>S7</b>  |
| Synthesis of [18]annulene by variation of the reductive system                                       | <b>S8</b>  |
| <b>4. X-ray data of hexadehydro[18]annulene</b>                                                      | <b>S9</b>  |
| <b>5. References</b>                                                                                 | <b>S9</b>  |
| <b>6. Spectra of all compounds (Uv/vis, NMR, HRMS)</b>                                               | <b>S10</b> |

## 1. General information

All chemicals were purchased from Sigma-Aldrich and used without any further purification. Solvents were distilled prior to usage.  $\text{CH}_2\text{Cl}_2$ ,  $\text{CHCl}_3$  and EtOAc were distilled from  $\text{K}_2\text{CO}_3$  prior to usage. THF and benzene were freshly distilled from Na/benzophenone prior to usage. Thin layer chromatography (TLC) was performed on Merck silica gel 60 F254, detected by UV-light (254 nm, 366 nm). Column chromatography and flash column chromatography were performed on Macherey–Nagel silica gel 60 M (230–400 mesh, 0.04–0.063 mm). NMR spectroscopy was performed on JEOL JNM EX 400 ( $^1\text{H}$ : 400 MHz,  $^{13}\text{C}$ : 100 MHz) and JEOL JNM GX 400 ( $^1\text{H}$ : 400 MHz,  $^{13}\text{C}$ : 100 MHz), and Bruker Avance 400 ( $^1\text{H}$ : 400 MHz,  $^{13}\text{C}$ : 100 MHz). Deuterated solvents were purchased from Sigma Aldrich and used as received. Chemical shifts are referenced to residual protic impurities in the solvents ( $\text{CHCl}_3$ :  $^1\text{H}$ : 7.24 ppm;  $\text{C}_2\text{H}_2\text{Cl}_4$ :  $^1\text{H}$ : 5.98 ppm; THF:  $^1\text{H}$ : 3.57 ppm and 1.73 ppm) or the deuterated solvent itself ( $\text{CDCl}_3$ :  $^{13}\text{C}$ : 77.0 ppm;  $\text{C}_2\text{D}_2\text{Cl}_4$ :  $^{13}\text{C}$ : 73.7 ppm; THF- $\text{D}_8$ :  $^{13}\text{C}$ : 67.3 ppm and 25.2 ppm). The resonance multiplicities are indicated as “s” (singlet), “d” (doublet), and “m” (multiplet). Signals referred to as bs (broad singlet) are not clearly resolved or significantly broadened. IR spectra were recorded on a Bruker FT-IR Tensor 27 spectrometer with a Pike MIRacle ATR unit. LDI/MALDI-ToF mass spectrometry was performed on a Shimadzu AXIMA Confidence (nitrogen laser, 50 Hz, 337 nm). In case of MALDI, the following matrix was used: 2,5-dihydroxybenzoic acid (DHB). High resolution mass spectrometry was performed on a ESI-ToF mass spectrometer Bruker maXis 4G UHR MS/MS spectrometer. Uv/vis spectroscopy was carried out on a Varian Cary 5000 UV-Vis-NIR spectrometer. Solid state Uv/vis was performed on a quartz glass light path window. Unless otherwise noted, reactions were degassed by the following technique: The reaction mixture was sonicated at 25 °C for 1 min under vacuo, followed by a purge with  $\text{N}_2$ -gas. This cycle was repeated three times.

## 2. Experimental procedures

### (3Z)-1,6-Trimethylsilyl-hexa-3-ene-1,5-diyne (6)

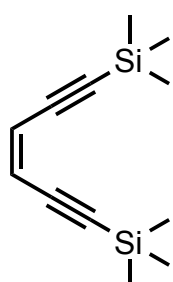

$C_{12}H_{20}Si_2$   
 $M = 220,46$

A 100 mL Schlenk round-bottom flask, protected from light, was charged with 337 mg (470  $\mu$ mol; 2 mol%)  $Pd(PPh_3)_2Cl_2$ , 183 mg (960  $\mu$ mol; 4 mol%)  $CuI$  and dissolved in a mixture of 12.0 mL *n*-butylamine and 35.0 mL benzene. The mixture was degassed and then 2.33 g (24.0 mmol) *cis*-1,2-dichloroethene was added. A solution of 5.19 g (52.8 mmol, 2.2 equiv.) trimethylsilylethyne in 10.0 mL benzene was added within 6 h by means of a PLASTIC syringe (20 mL) and a syringe pump. The reaction mixture was stirred at rt under  $N_2$ -atmosphere over night for 15 h. The red solution was quenched with 40 mL of a saturated aqueous  $NH_4Cl$  solution, the layers were separated, the aqueous layer was extracted 3x 20 mL  $Et_2O$ , the combined organics were washed 1x 20 mL saturated solution of  $NH_4Cl$ , 1x 20 mL  $H_2O$  and 1x 20 mL brine. The crude solution was dried with  $MgSO_4$ , filtered, evaporated (100 mbar, 40  $^{\circ}C$ ) and purified by liquid chromatography ( $SiO_2$ ; 4x25 cm; hexanes). The pale yellow oil was dried in vacuo, yielding the product in 90 % (4.76 g; 21.4 mmol).

*Attention: In order to prevent cis/trans isomerization, the product should be stored in darkness at 4  $^{\circ}C$ . Over a period of several months, no decomposition or isomerization was observed under these conditions.*

**$R_f$  (solvent):** 0.35 (hexanes);

**$^1H$  NMR (400 MHz;  $CDCl_3$ ; rt):**  $\delta$  [ppm] = 5.83 (s, 2H), 0.20 (s, 9H).

**$^{13}C$  NMR (100 MHz;  $CDCl_3$ ; rt):**  $\delta$  [ppm] = 120.6, 103.4, 101.8, -0.1.

**MS (MALDI, DHB):**  $m/z$  (*rel. int.*) = 221 [ $M$ ]<sup>+</sup> (100).

**HRMS (APPI, toluene):**  $m/z$  calc. for  $C_{12}H_{20}Si_2$  [ $M$ ]<sup>+</sup>: 220.109805, found: 220.110259.

**IR (ATR, rt):**  $\tilde{\nu}$  [ $cm^{-1}$ ] = 3044, 2960, 2900, 2156, 2122, 1680, 1568, 1408, 1387, 1249, 1069, 976, 836, 758, 699, 634.

**Uv/vis (*n*-hexane; rt):**  $\lambda_{max}$  [nm] ( $\epsilon$  [ $M^{-1}cm^{-1}$ ]) = 273 (20600), 289 (23300).

**EA for  $C_{12}H_{20}Si_2$ :** Calc.: C 65.38, H 9.14, Si 25.48; found: C 65.36, H 9.10;

## 1,3,7,9,13,15-Hexadehydro-[18]annulene (5)

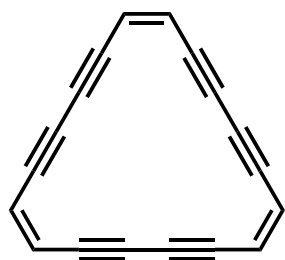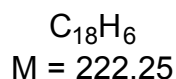

A 100 mL Schlenk round-bottom flask, protected from light, was charged with 50.0 mL (50.0 mmol) of a 1 M TBAF/ THF solution at 0 °C under N<sub>2</sub>-atmosphere. While stirring, 5.00 g (22.7 mmol) (3Z)-1,6-trimethylsilyl-hexa-3-ene-1,5-diyne were added neat via syringe over 2 min. The mixture turned black immediately and was stirred for 1 h. Then the mixture was cannulated to a 1 L round bottom flask equipped with a rubber septum and containing a vigorously stirred mixture of 30.0 g (150 mmol) Cu(OAc)<sub>2</sub>·H<sub>2</sub>O in 500 mL pyridine. The dark blue pyridine/Cu-mixture turned black immediately. The mixture was allowed to stir in darkness at rt for another 20 h, before it was quenched by pouring the mixture to a 600 mL mixture of 1:1 Et<sub>2</sub>O/2 M HCl and stirred well for 15 min. The organic layer was separated. The aqueous layer was filtered through a Büchner funnel and the precipitate was washed with 150 mL Et<sub>2</sub>O. The organic layer was separated again and all organics were combined. Additional Et<sub>2</sub>O was added to give 500 mL of organics. The combined organics were washed with 4x 200 mL 1:1 saturated CuSO<sub>4</sub>/H<sub>2</sub>O solution, 1x 50 mL saturated NH<sub>4</sub>Cl solution, 1x 50 mL brine and dried over Na<sub>2</sub>SO<sub>4</sub> to yield a light brown solution. The solution was concentrated in vacuo and purified by liquid chromatography (SiO<sub>2</sub>; 6x30 cm; 20:1 hexane/ EtOAc). The amber solid was dried in vacuo, yielding the product in 24 % (404 mg; 1.82 mmol).

*Attention: While concentrating the solution on the rotary evaporator, do not exceed a temperature of over 35 °C. When precipitation in the flask occurs, further evaporation should be proceeded with an oil pump around 0 °C to prevent decomposition. The product is best stored in a frozen solution of benzene under argon atmosphere in the freezer. In the solid state, rapid decomposition can be observed.*

**R<sub>f</sub> (solvent):** 0.23 (20:1 hexanes/EtOAc);

**<sup>1</sup>H NMR (400 MHz; C<sub>2</sub>D<sub>2</sub>Cl<sub>4</sub>; rt):** δ [ppm] = 7.20 (s, 6H).

**<sup>13</sup>C NMR (100 MHz; C<sub>2</sub>D<sub>2</sub>Cl<sub>4</sub>; rt):** δ [ppm] = 121.5, 83.5, 83.2.

**HRMS (APPI, toluene):** *m/z* calc. for C<sub>18</sub>H<sub>6</sub> [M]<sup>+</sup>: 222.046402, found: 222.046492.

**IR (ATR, rt):**  $\tilde{\nu}$  [cm<sup>-1</sup>] = 3057, 2186, 2113, 1841, 1654, 1472, 1417, 1272, 1185, 951, 732.

**Uv/vis (hexanes; rt):**  $\lambda_{max}$  [nm] = 319sh, 334, 358, 368sh, 379, 389.

**Uv/vis (cyclohexane; rt):**  $\lambda_{max}$  [nm] ( $\epsilon$  [M<sup>-1</sup>cm<sup>-1</sup>]) = 227 (25500), 236 (21500), 260 (5900), 315 sh (41000), 317 (41500), 333 (75800), 357 (13000), 366 (7400), 378 (15500), 388 (17600), 405 sh (790).<sup>1</sup>

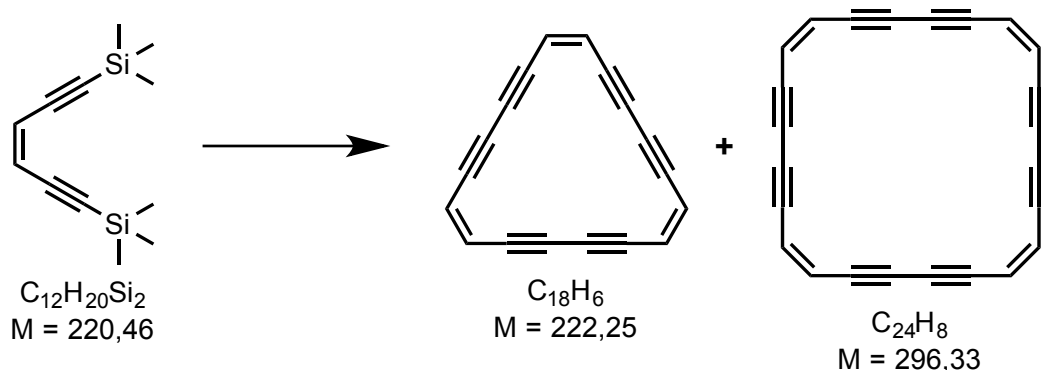

As **minor product**, cyclic tetramer ( $C_{24}H_8$ ) was formed in 5 %.<sup>2</sup>

**R<sub>f</sub> (solvent):** 0.12 (20:1 hexanes/EtOAc);

**<sup>1</sup>H NMR (400 MHz; C<sub>2</sub>D<sub>2</sub>Cl<sub>4</sub>; rt):**  $\delta$  [ppm] = 6.07 (s, 8H).

**<sup>13</sup>C NMR (100 MHz; C<sub>2</sub>D<sub>2</sub>Cl<sub>4</sub>; rt):**  $\delta$  [ppm] = 121.4, 82.7, 82.6.

**HRMS (APPI, MeOH):**  $m/z$  calc. for  $C_{24}H_8$  [M]<sup>+</sup>: 296.062052, found: 296.061979.

### [18]Annulene (1)

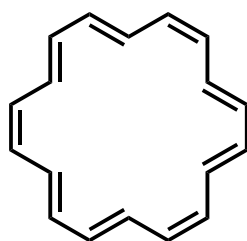

C18H18  
 $M = 234,34$

A 100 mL Schlenk round-bottom flask, was charged with 25 mg 5 % Pd/CO<sub>3</sub>/Pb (Lindlar catalyst) and poisoned with 1 drop quinoline. The catalyst was suspended in 25 mL benzene and 60 mg (0.27 mmol) hexadehydro[18]annulene was added. The mixture was degassed under vacuo/ sonication for 1 min and the atmosphere was exchanged by H<sub>2</sub>-gas. The mixture was stirred at rt under H<sub>2</sub>-atmosphere for 1 h. The yellow greenish mixture was filtered, concentrated in vacuo, and purified by liquid chromatography (SiO<sub>2</sub> 2x20 cm; 23:1:1 pentane/cyclohexane/benzene). The brownish solid was dried in vacuo, yielding the product in 20 % (13 mg; 54  $\mu$ mol).

**R<sub>f</sub> (solvent):** 0.42 (20:1 hexanes/EtOAc);

**<sup>1</sup>H NMR (400 MHz; THF-D<sub>8</sub>; rt):**  $\delta$  [ppm] = 8.88 (bs, 12H), -1.92 (bs, 6H).

**<sup>1</sup>H NMR (400 MHz; THF-D<sub>8</sub>; -40 °C):**  $\delta$  [ppm] = 9.24 (dd, 12H), -2.83 (m, 6H).

**<sup>13</sup>C NMR (100 MHz; THF-D<sub>8</sub>; -40 °C):**  $\delta$  [ppm] = 127.8, 121.5.

**HRMS (APPI, toluene):**  $m/z$  calc. for  $C_{18}H_{18}$  [M]<sup>+</sup>: 234.140302, found: 234.140542.

**IR (ATR, rt):**  $\tilde{\nu}$  [cm<sup>-1</sup>] = 3057, 2186, 2113, 1841, 1654, 1472, 1417, 1272, 1185, 951, 732.

**Uv/vis (CH<sub>2</sub>Cl<sub>2</sub>; rt):**  $\lambda_{max}$  [nm] = 275 (300000), 454 (25000).

### 3. Additional experimental results

#### Coupling of TMS-acetylene and 1,2-dichloroethene to (3Z)-1,6-trimethylsilyl-hexa-3-ene-1,5-diyne

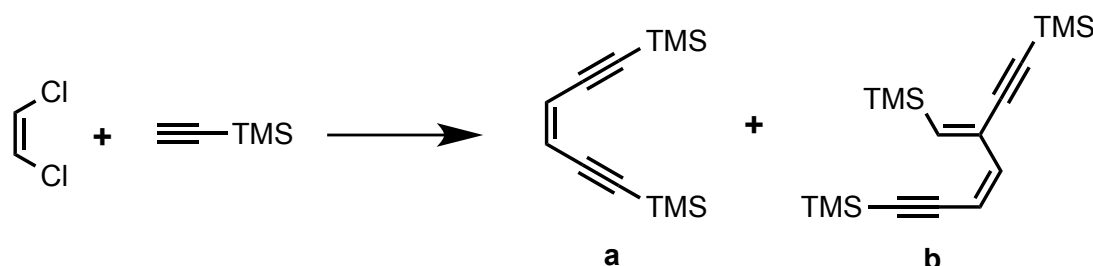

**Scheme S1** Synthesis of 1,6-di-(trimethylsilyl)-hex-3-en-1,5-diyne **a**.

Overall procedure: catalyst and copper (I) iodide were placed in a Schlenk flask (50 ml). Solution of *cis*-1,2-dichloroethylene (776 mg, 8.0 mmol) and *n*-butylamine (4.0 mL) in benzene (4 mL) was added and the rest of material was washed from the vial with benzene (5 mL). The reaction vessel was closed with a fresh rubber septum and degassed. The reaction flask was isolated from day light by aluminum foil and a solution of TMS-ethyne in benzene (5 mL) was added during 6 h by means of a PLASTIC syringe (10 mL) and a syringe pump at rt. The reaction mixture was stirred for additional 17 h. The resulted dark red solution with large amount of precipitates was poured into a saturated solution of NH<sub>4</sub>Cl (20 mL) and diethyl ether (20 mL). The organic layer was separated and the dark blue aqueous layer was extracted with diethyl ether (3x10 mL). The combined organics were washed with a saturated aqueous solution of NH<sub>4</sub>Cl (10 mL), brine (2x10 mL), dried over MgSO<sub>4</sub>, filtered and evaporated in vacuo (100 mbar, 40°C) to give a dark red oil. This oil was redissolved in hexanes (40 mL), filtered and evaporated in vacuo (100 mbar, 40 °C) to give the crude product as a dark red oil, which was analyzed by <sup>1</sup>H NMR. All mixtures contained only compounds **a** and, presumably, **b** by <sup>1</sup>H NMR data. Monochloro-compound was NOT detected in any reaction mixtures. Identification of **b** was assigned only by NMR data and literature search.<sup>3</sup> Results of experiments are summarized in the Table 1.

**Table S1** Synthesis of 1,6-di-(trimethylsilyl)-hex-3-en-1,5-diyne **a**.

| N                    | TMS-ethyne, equiv. | Catalyst                                             | Catalyst, [mol%] | Copper (I) iodide, [mol%] | Ratio a:b (by <sup>1</sup> H NMR data) |
|----------------------|--------------------|------------------------------------------------------|------------------|---------------------------|----------------------------------------|
| 1                    | 2.5                | Pd(PPh <sub>3</sub> ) <sub>4</sub>                   | 5                | 10                        | 57 : 43                                |
| 2                    | 2.5                | PdCl <sub>2</sub> (PPh <sub>3</sub> ) <sub>2</sub>   | 5                | 10                        | 60 : 40                                |
| 3 <sup>a</sup>       | 3.0                | PdCl <sub>2</sub> (PPh <sub>3</sub> ) <sub>2</sub>   | 5                | 10                        | 74 : 26                                |
| 4                    | 3.0                | PdCl <sub>2</sub> (PPh <sub>3</sub> ) <sub>2</sub>   | 5                | 10                        | 81 : 19                                |
| 5                    | 2.2                | PdCl <sub>2</sub> (PPh <sub>3</sub> ) <sub>2</sub>   | 5                | 10                        | 98 : 2                                 |
| <b>6<sup>b</sup></b> | <b>2.2</b>         | <b>PdCl<sub>2</sub>(PPh<sub>3</sub>)<sub>2</sub></b> | <b>2</b>         | <b>4</b>                  | <b>98 : 2</b>                          |

a – septum was not fresh; b – the reaction was done without protection from day light.

## Deprotection of (3Z)-1,6-trimethylsilyl-hexa-3-ene-1,5-diyne and coupling to hexadehydro[18]annulene

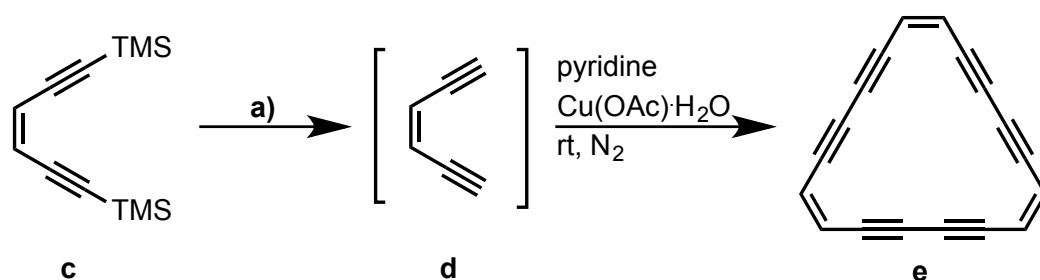

**Scheme S2** Improvement of deprotection of **c** to **d** by variation of fluoride sources.

Overall procedure: Deprotecting agent was placed in a Schlenk flask (50 mL) and dissolved in 25 mL THF. Then 2.50 g (11.3 mmol) (3Z)-1,6-trimethylsilyl-hexa-3-ene-1,5-diyne **c** was added neat over 1 min. The reaction mixture was stirred for 3 h at rt and then cannulated to a mixture of  $\text{Cu}(\text{OAc})_2 \cdot \text{H}_2\text{O}$ /pyridine. The quality of the deprotection was estimated by the isolated yield of hexadehydro[18]annulene **e**. A summary can be found in table S2.

**Table S2** Improvement of deprotection of **c** to **d** by variation of fluoride sources.

| N              | F- source   | Additional reagent/ solvent          | Isolated yield of <b>e</b> [%] |
|----------------|-------------|--------------------------------------|--------------------------------|
| 1              | CsF         | $\text{H}_2\text{O}$                 | 16                             |
| 2              | KF          | $\text{H}_2\text{O}$                 | 11                             |
| 3              | KF          | 10% 18-crown-6, $\text{H}_2\text{O}$ | 18                             |
| 4              | HF/pyridine | --                                   | 9                              |
| 5 <sup>a</sup> | --          | --                                   | 9                              |
| 6 <sup>b</sup> | TBAF        | --                                   | 19                             |
| 7 <sup>c</sup> | <b>TBAF</b> | --                                   | <b>24</b>                      |

a – protected enediyne **c** was directly introduced to  $\text{Cu}(\text{OAc})_2 \cdot \text{H}_2\text{O}$ /pyridine mixture. Deprotection occurred by Cu-mixture; b – stirred for 30 min; c – stirred for 1 h at 0 °C under  $\text{N}_2$ -atmosphere.

## Oxidative coupling to hexadehydro[18]annulene by variation of the Cu-system

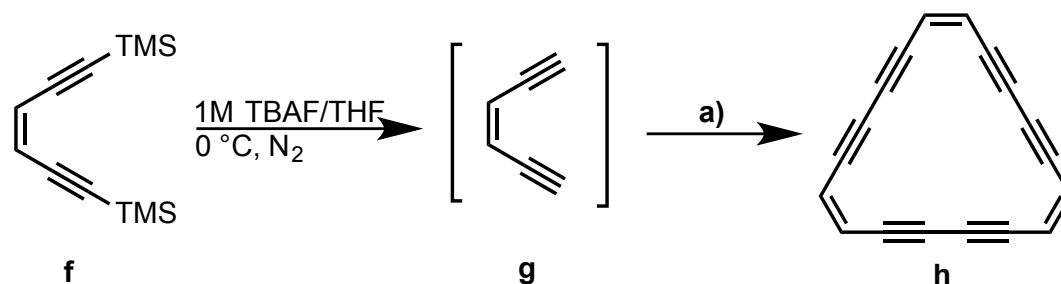

**Scheme S3** Improvement of the oxidative coupling to **h** by variation of the Cu-system.

Overall procedure: 300 mg (1.36 mmol) (3Z)-1,6-trimethylsilyl-hexa-3-ene-1,5-diyne **f** was deprotected by TBAF/THF at 0 °C for 1 h. The reaction mixture containing **g**, was cannulated to a mixture of the Cu-system. A summary can be found in table S3.

**Table S3** Improvement of synthesis of hexadecahydro[18]annulene **h** by variation of the Cu-system.

| N        | Cu-system                                          | Virtual molarity of <b>g</b> in Cu-system [M] | Isolated yield of <b>h</b> [%] |
|----------|----------------------------------------------------|-----------------------------------------------|--------------------------------|
| 1        | Cu(OAc) <sub>2</sub> ·H <sub>2</sub> O/pyridine    | 0.010                                         | 4                              |
| 2        | Cu(OAc) <sub>2</sub> ·H <sub>2</sub> O/pyridine    | 0.030                                         | 13                             |
| <b>3</b> | <b>Cu(OAc)<sub>2</sub>·H<sub>2</sub>O/pyridine</b> | <b>0.045</b>                                  | <b>24</b>                      |
| 4        | Cu(OAc) <sub>2</sub> ·H <sub>2</sub> O/pyridine    | 0.060                                         | 18                             |
| 5        | CuCl/TMEDA/O <sub>2</sub> /acetone                 | 0.045                                         | 0 <sup>a</sup>                 |

a – by TLC, another mayor product was formed which was most likely the cyclic dimer (C<sub>12</sub>H<sub>4</sub>).

### Synthesis of [18]annulene by variation of the reductive system

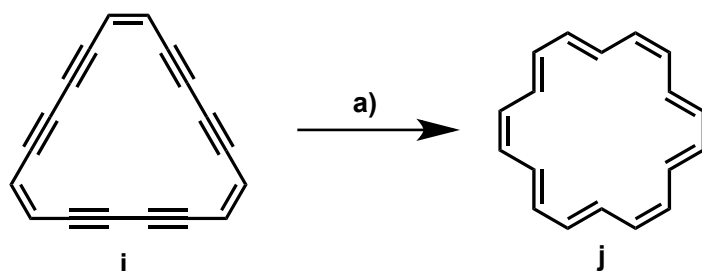

**Scheme S4** Reduction of **i** to [18]annulene **j** by variation of reductive system.

Different reductive systems were applied to reduce **i** to **j**. The results are summarized in table S4.

**Table S4** Summary of applied reductive systems for the synthesis of **j**.

| N        | Reductive system                         | Additive         | Solvent                  | Temperature [°C] | Isolated yield of <b>j</b> [%] |
|----------|------------------------------------------|------------------|--------------------------|------------------|--------------------------------|
| 1        | 5% Pd/BaSO <sub>4</sub>                  | quinoline        | benzene                  | rt               | 15-20                          |
| 2        | 5% Pd/BaSO <sub>4</sub>                  | pyridine         | benzene                  | rt               | 12-16                          |
| <b>3</b> | <b>5% Pd/CaCO<sub>3</sub>/Pb</b>         | <b>quinoline</b> | <b>benzene</b>           | <b>rt</b>        | <b>17-23</b>                   |
| 4        | 5% Pd/BaSO <sub>4</sub>                  | --               | benzene                  | rt               | 5-10                           |
| 5        | 5% Pd/CaCO <sub>3</sub> /Pb              | --               | benzene                  | rt               | 5-10                           |
| 6        | 10% Pd/CaCO <sub>3</sub>                 | --               | benzene                  | rt               | 5-10                           |
| 7        | 5% Pd/CaCO <sub>3</sub> /Pb              | quinoline        | EtOAc                    | rt               | 5-10                           |
| 8        | 5% Pd/CaCO <sub>3</sub> /Pb              | quinoline        | EtOAc                    | 0                | 0-5                            |
| 9        | 5% Pd/CaCO <sub>3</sub> /Pb              | quinoline        | EtOAc                    | -78              | --                             |
| 10       | Na                                       | --               | NH <sub>3</sub> (liquid) | -78              | 0                              |
| 11       | H <sub>2</sub> SnBu <sub>3</sub> / ZnCu* | --               | MeOH                     | rt               | 0                              |
| 12       | CrCl <sub>2</sub>                        | --               | MeOH                     | rt               | 0                              |



## 4. X-ray data of hexadecylo[18]annulene

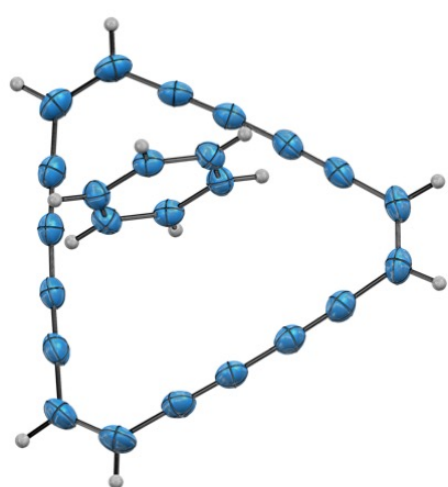

**Crystal Data.**  $C_{24}H_{12}$ ,  $M = 300.34$ , tetragonal,  $a = 21.6492(2)$  Å,  $c = 14.6312(2)$  Å,  $V = 6857.48(17)$  Å<sup>3</sup>,  $T = 173.1(6)$ , space group  $I41/acd$  (no. 142),  $Z = 16$ ,  $\mu(\text{Cu K}\alpha) = 0.505$ , 9384 reflections measured, 1342 unique ( $R_{\text{int}} = 0.0315$ ) which were used in all calculations. The final  $wR_2$  was 0.1203 (all data) and  $R_1$  was 0.0388 ( $I > 2\sigma(I)$ ).

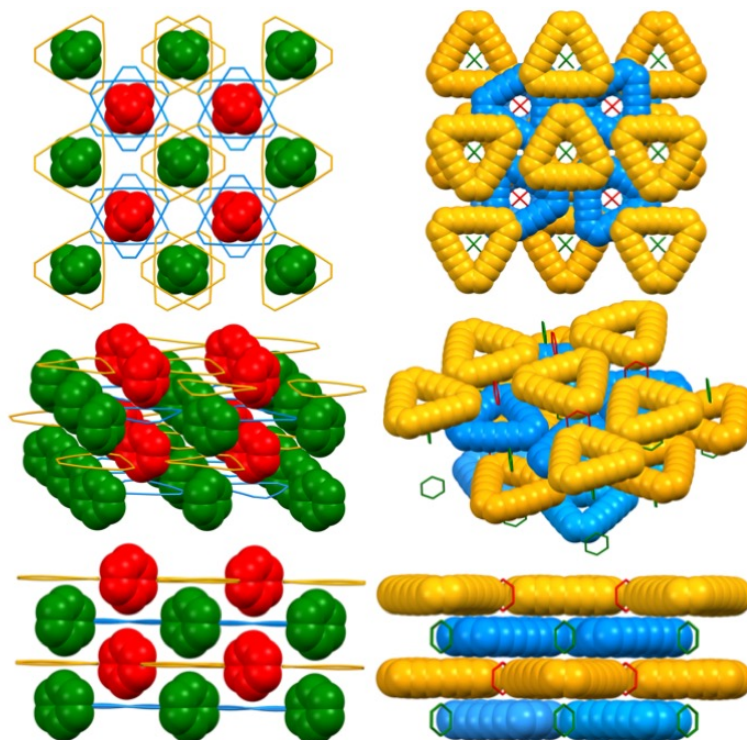

**Fig. S1** left: Crystal data and depictions of hexadecylo[18]annulene **5**; right: crystal packing of **5** in benzene matrix; benzene depicted in green and red, **5** depicted in yellow and blue; hydrogens are omitted for clarity.

## 5. References

- 1 W. H. Okamura and F. Sondheimer, *J. Am. Chem. Soc.*, 1967, **89**, 5991–5992.
- 2 M. Suzuki, A. Comito, S. I. Khan and Y. Rubin, *Org. Lett.*, 2010, **12**, 2346–2349.
- 3 K. Peter, K. P. C. Vollhardt and L. S. Winn, *Tetrahedron Lett.*, 1985, **26**, 709–712.

## 6. Spectra of all compounds (Uv/vis, NMR, HRMS)

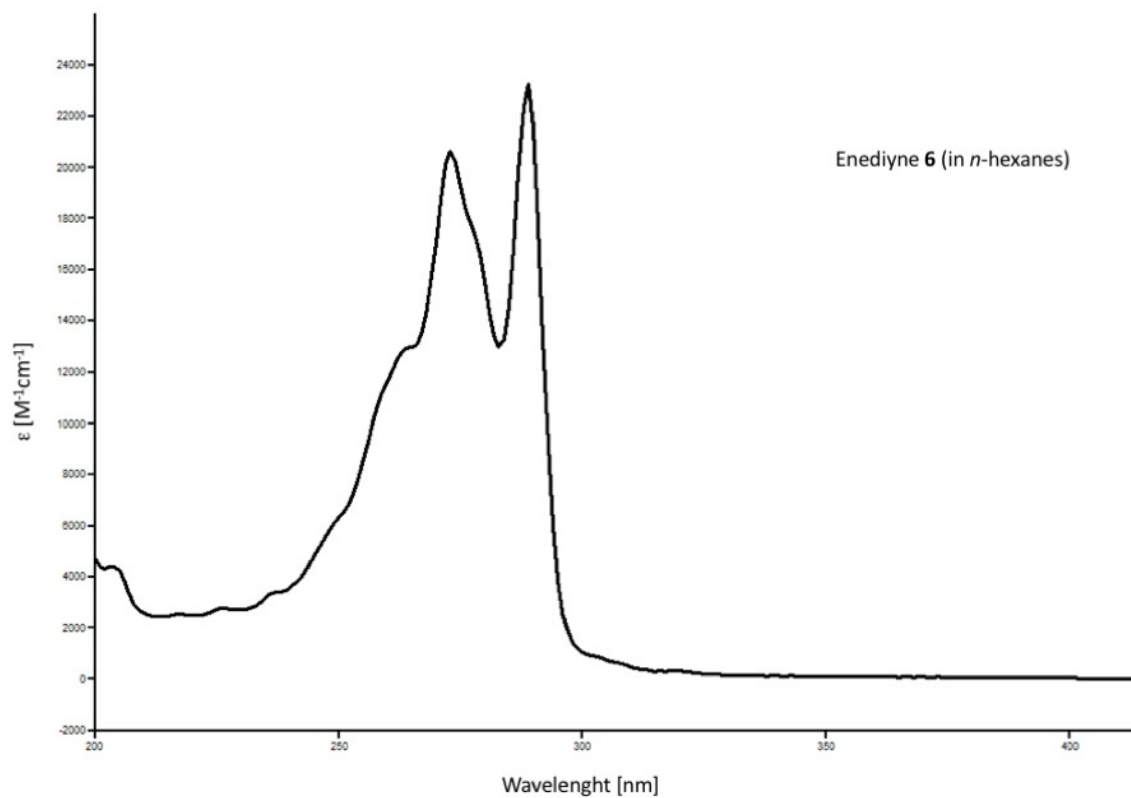

Fig. S2 UV/vis spectrum of 6 in *n*-hexane.

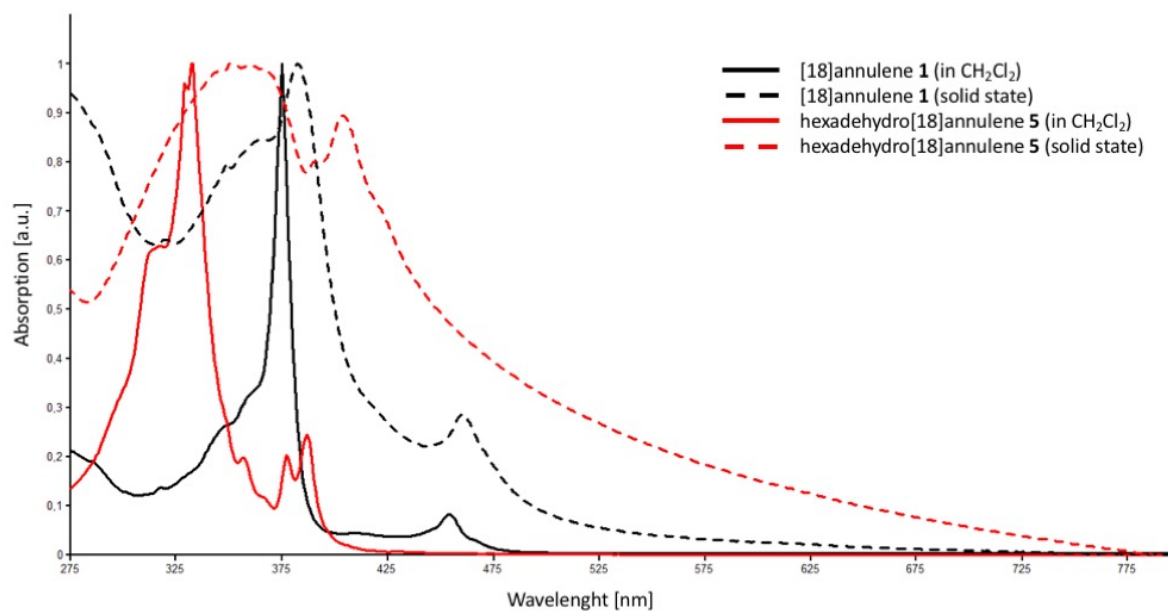

Fig. S3 normalized UV/vis spectra of 1 and 5 in solution and in the solid state.

C:\WINNMR98\Data\lum4629\k-ALS  
#4629\JLUNGERICH\LumDP71\CDCl3\1H/RT/CHP

DATIM Wed Sep 30 15:45:25 2015

|       |            |
|-------|------------|
| EXMOD | NON        |
| OBNUC | 1H         |
| OFR   | 400.05 MHz |
| OBSET | 129.10 KHz |
| OBFIN | 3738.5 Hz  |
| IRNUC | 1H         |
| IRFR  | 400.05 MHz |
| IRSET | 120.00 KHz |
| IRFIN | 10600.0 Hz |
| FREQ  | 8000.0 Hz  |
| POINT | 65536      |
| SAMPO | 32768      |
| DUMMY | 2          |
| TIMES | 64         |
| SCANS | 64         |
| RESOL | 0.12 Hz    |
| PW1   | 10.0 us    |
| PW2   | 10.0 us    |
| PW3   | 10.0 us    |
| PI1   | 1.000 ms   |
| PI2   | 1.000 ms   |
| PI3   | 1.00 ms    |
| ACQTM | 4.096 sec  |
| PD    | 4.000 sec  |
| SLVNT | CDCl3      |
| CTEMP | 21.7 c     |
| RGAIN | 13         |
| BF    | 0.12 Hz    |
| EXREF | 7.24 ppm   |
| TMS   | 39642      |

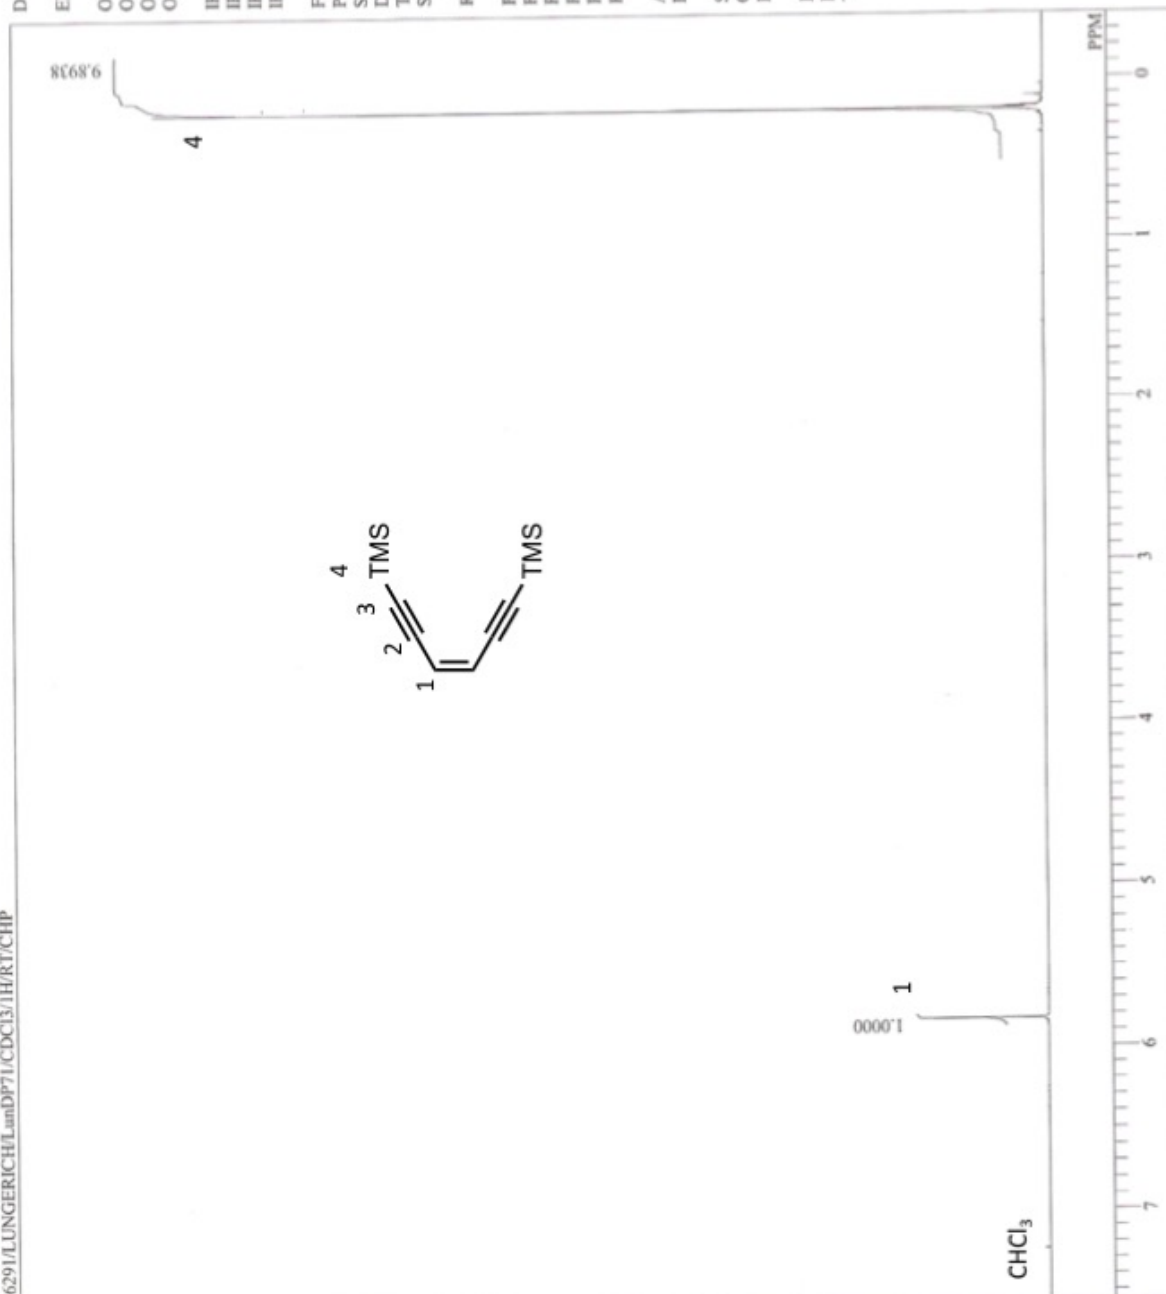

Fig. S4 <sup>1</sup>H NMR of **6** in CDCl<sub>3</sub> at rt (400 MHz).

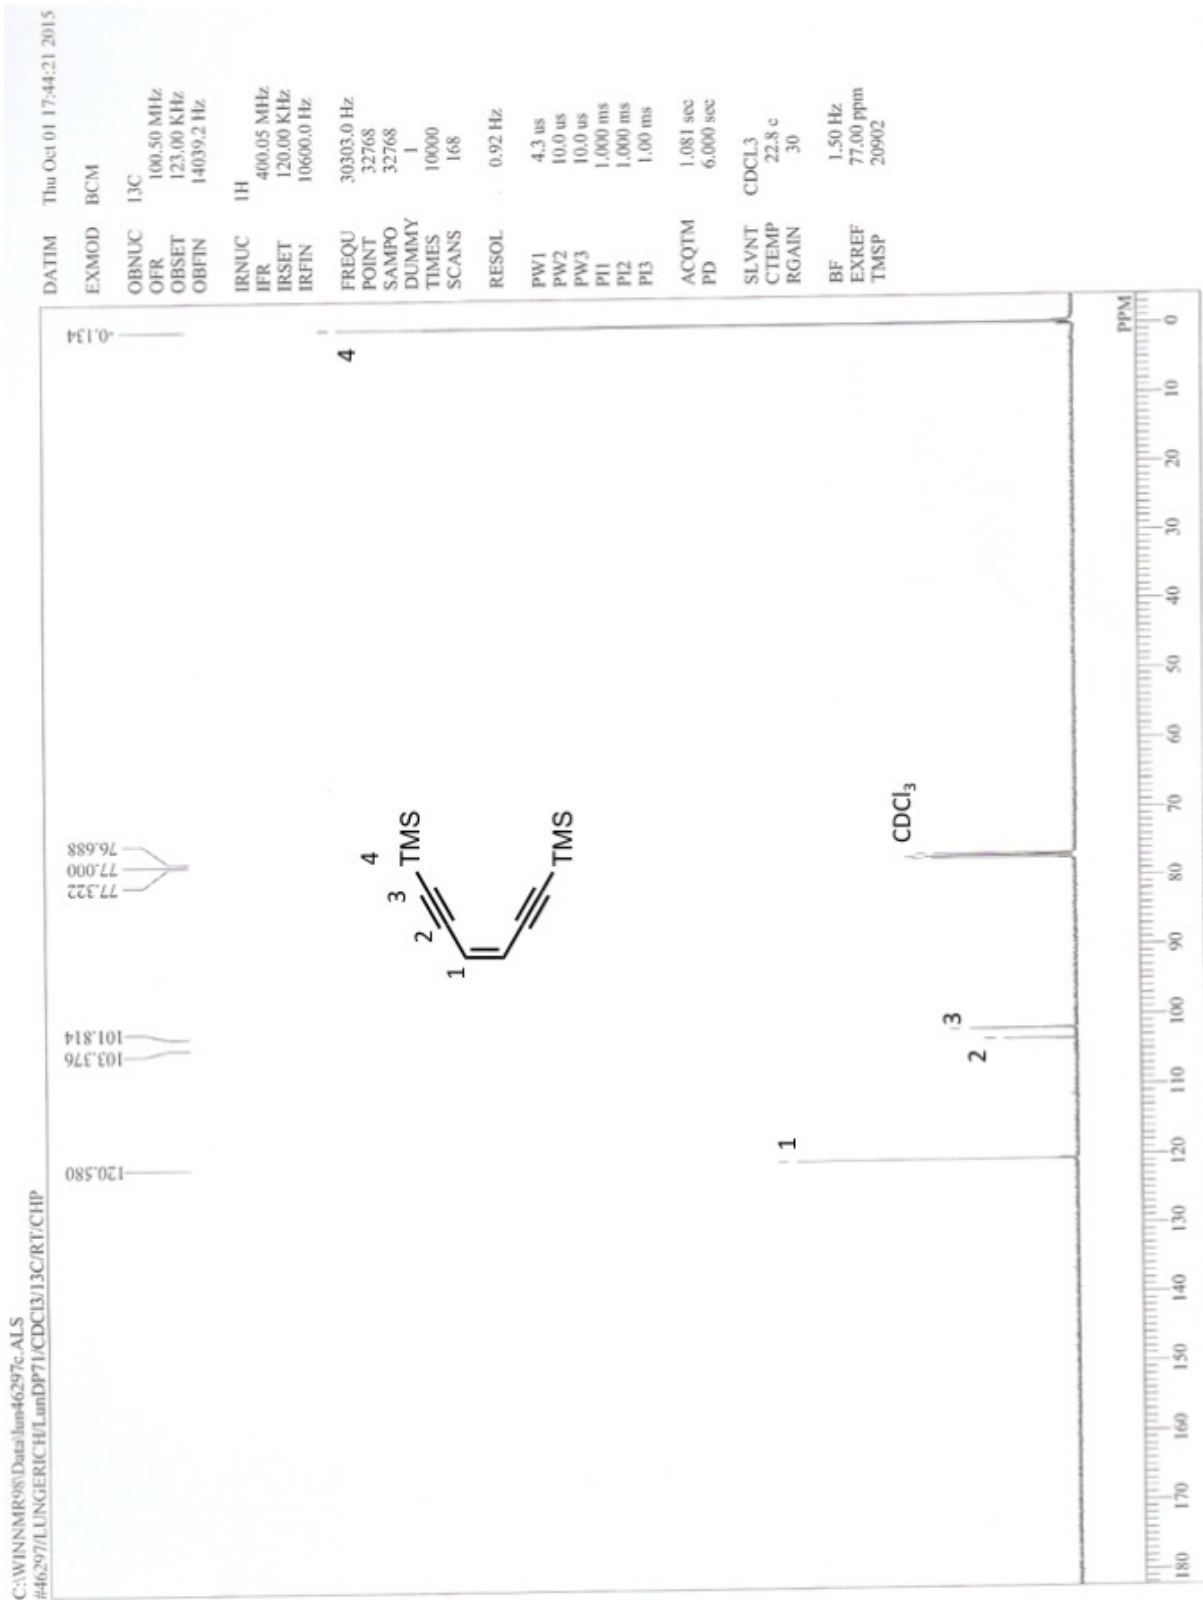

Fig. S5 <sup>13</sup>C NMR of 6 in CDCl<sub>3</sub> at rt (100 MHz).

# Display Report

**Analysis Info**  
 Analysis Name: D:\Data\Jux-2015-Ilungerich-P-71-appi-.d  
 Acquisition Date: 10/1/2015 1:33:11 PM  
 Method: APPI-kleine-Massen-ab-100-.m  
 Operator: MD  
 Sample Name: maXis 4G  
 Instrument: MD  
 Comment: Toluol  
 Sample Name: 20183

**Acquisition Parameter**  
 Source Type: APPI  
 Focus: Not active  
 Scan Begin: 100 m/z  
 Scan End: 1400 m/z  
 Ion Polarity: Positive  
 Set Capillary: 800 V  
 Set End Plate Offset: -500 V  
 Set Collision Cell RF: 2500.0 Vpp  
 Set Nebulizer: 3.0 Bar  
 Set Dry Heater: 200 °C  
 Set Dry Gas: 2.0 l/min  
 Set Divert Valve: Waste

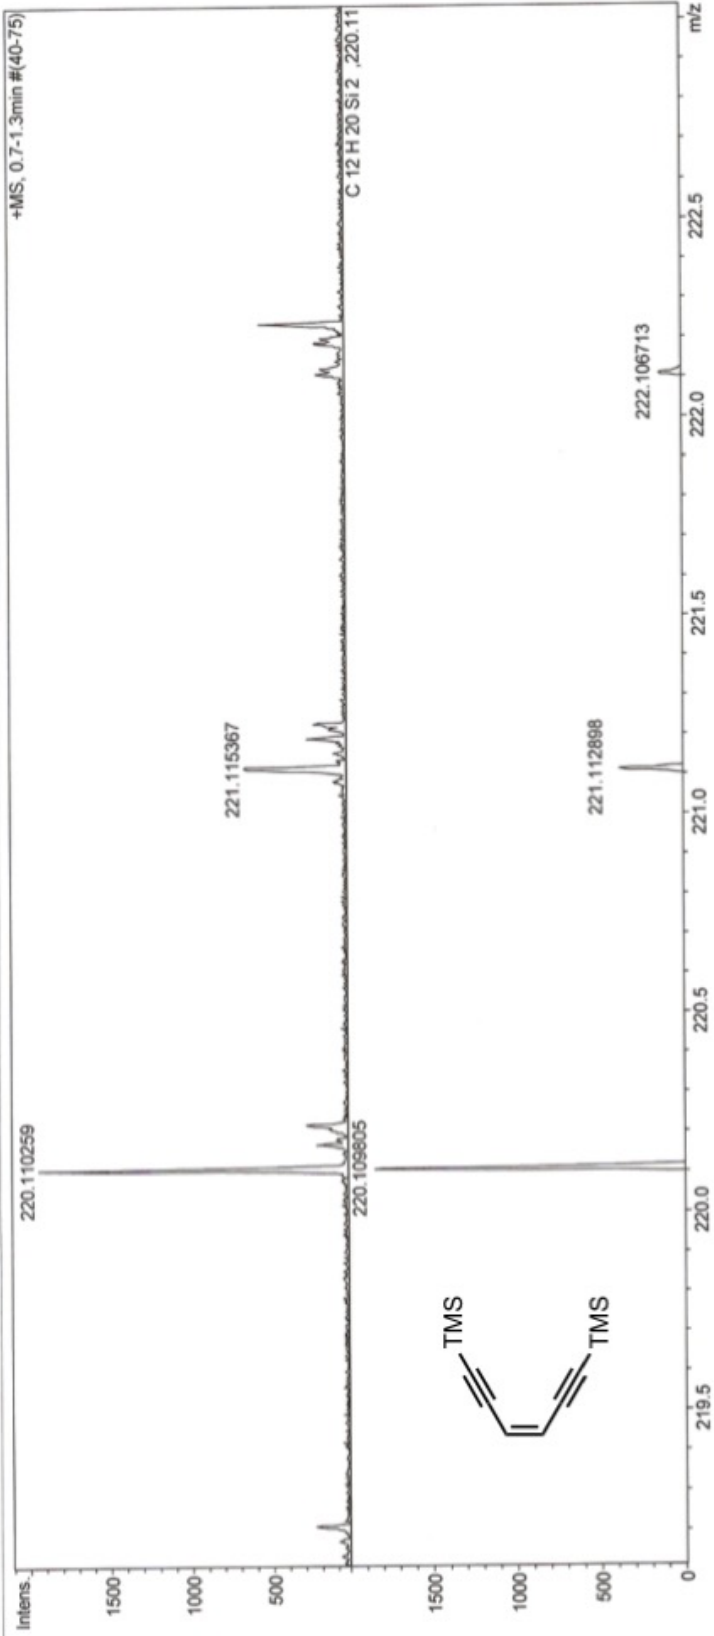

Fig. S6 HRMS of 6 (APPI, toluene).

C:\WINNMR98\Data\June46448h.ALS.TCLE  
#46448/LUNGERICH/LunDM2/CP1H/Nospin/RT/CHP

DATIM Fri Nov 06 11:01:59 2015

EXMOD NON

OBNUC IH  
OFR 400.05 MHz  
OBSET 129.10 KHz  
OBFIN 3738.5 Hz

IRNUC IH  
IFR 400.05 MHz  
IRSET 120.00 KHz  
IRFIN 10600.0 Hz

FREQU 8000.0 Hz  
POINT 65536  
SAMPO 32768  
DUMMY 4  
TIMES 48  
SCANS 48

RESOL 0.12 Hz

PW1 10.0 us  
PW2 10.0 us  
PW3 10.0 us  
P1 1.000 ms  
P2 1.000 ms  
P3 1.000 ms

ACQTM 4.096 sec  
PD 4.000 sec

SLVNT TCLE  
CTEMP 21.6 c  
RGAIN 17

BF 0.12 Hz  
EXREF 5.98 ppm  
TMSP 44330

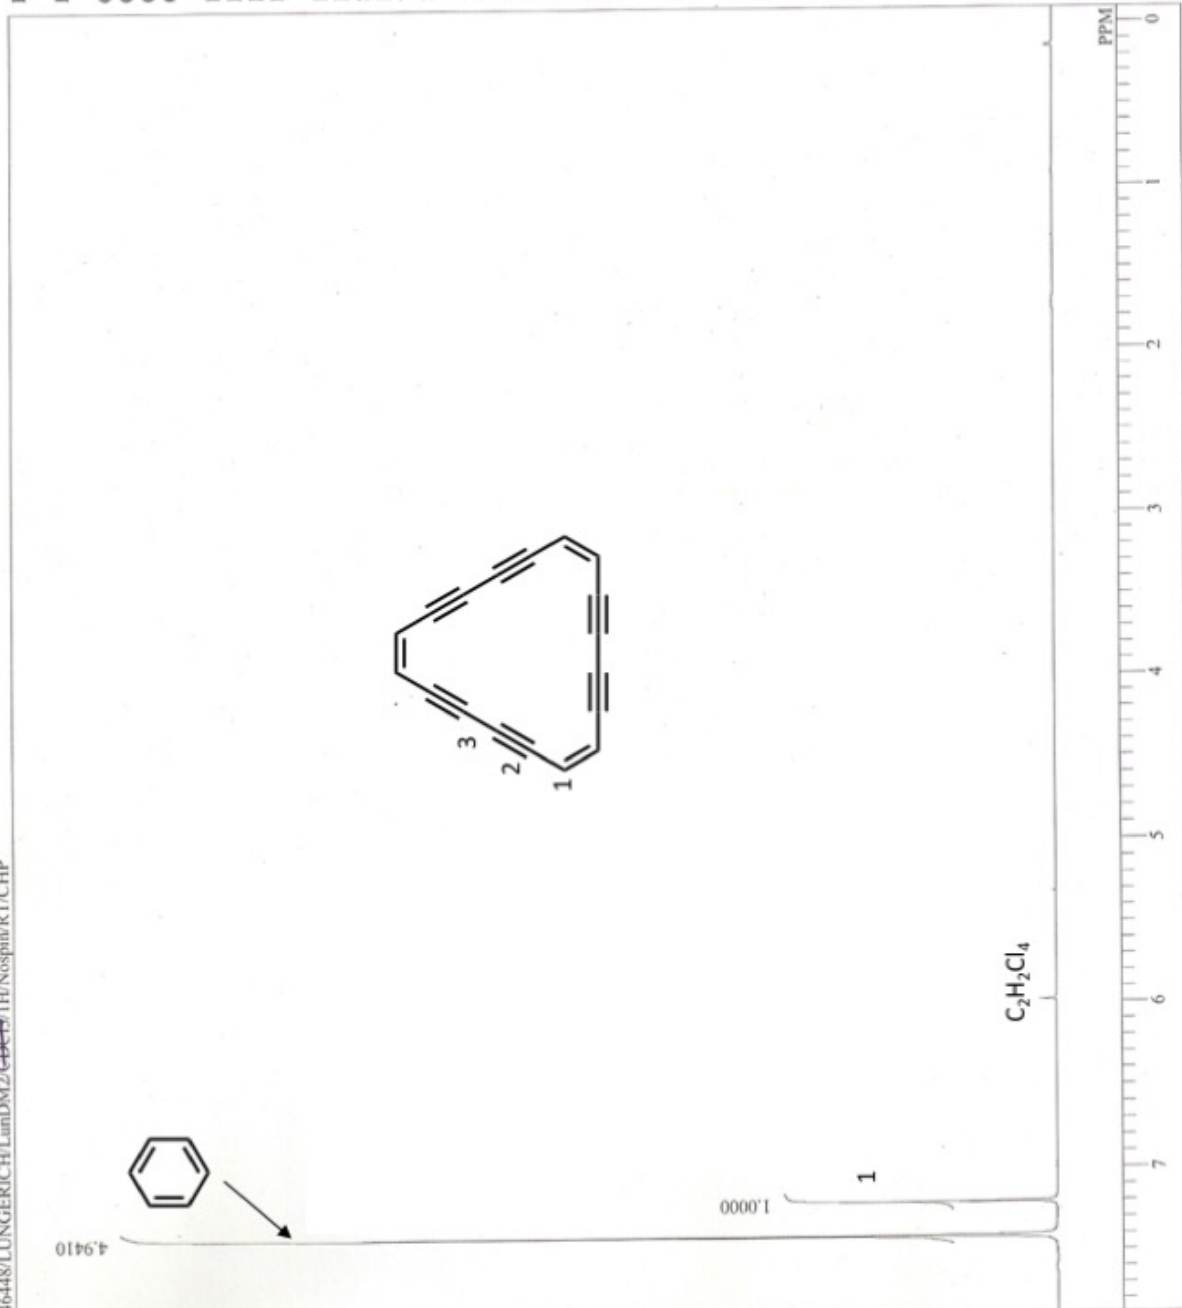

Fig. S7 <sup>1</sup>H NMR of 5 in C<sub>2</sub>D<sub>2</sub>Cl<sub>4</sub> at rt (400 MHz).

C:\WINNMR98\Data\lms46448-ALS

#46448/LUNGERICH/LumDM2/TCLE/13C/Nospin/RT/CHP

DATIM Fri Nov 06 11:15:51 2015

|       |            |
|-------|------------|
| EXMOD | BCM        |
| OBNUC | 13C        |
| OFR   | 100.50 MHz |
| OBSF  | 123.00 KHz |
| OBFIN | 14039.2 Hz |
| IRNUC | 1H         |
| IFR   | 400.05 MHz |
| IRSET | 120.00 KHz |
| IRFIN | 10600.0 Hz |
| FREQ  | 30303.0 Hz |
| POINT | 32768      |
| SAMPO | 32768      |
| DUMMY | 1          |
| TIMES | 10000      |
| SCANS | 104        |
| RESOL | 0.92 Hz    |
| PW1   | 4.3 us     |
| PW2   | 10.0 us    |
| PW3   | 10.0 us    |
| PI1   | 1.000 ms   |
| PI2   | 1.000 ms   |
| PI3   | 1.00 ms    |
| ACQTM | 1.081 sec  |
| PD    | 6.000 sec  |
| SLVNT | TCLF       |
| CTEMP | 22.9 c     |
| RGAIN | 30         |
| BF    | 1.50 Hz    |
| EXREF | 73.70 ppm  |
| TMSP  | 21241      |

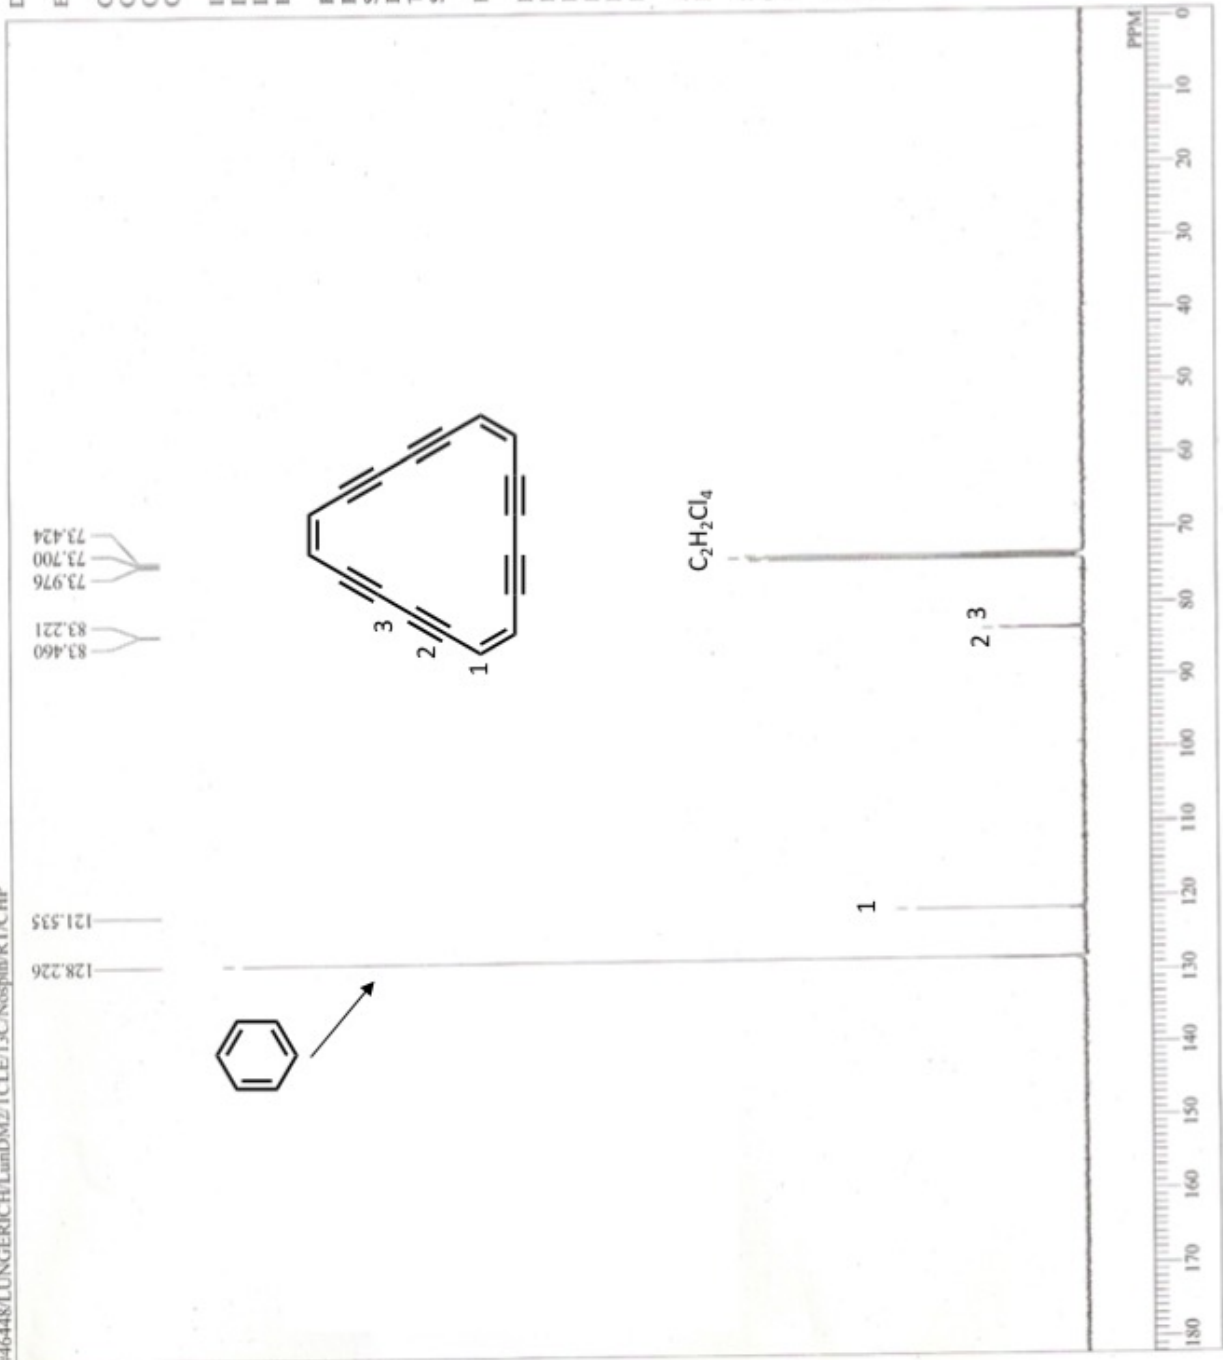

Fig. S8 <sup>13</sup>C NMR of 5 in C<sub>2</sub>D<sub>2</sub>Cl<sub>4</sub> at rt (100 MHz).

DATIM Fri Nov 06 11:15:51 2015

EXMOD BCM  
OBNUC 13C  
OPR 100.50 MHz  
OBSET 123.00 KHz  
OBFIN 14039.2 Hz  
IRNUC 1H  
IFR 400.05 MHz  
IRSET 120.00 KHz  
IRFIN 106000.0 Hz  
FREQU 30303.0 Hz  
POINT 32768  
SAMPO 32768  
DUMMY 1  
TIMES 10000  
SCANS 104  
RESOL 0.92 Hz  
PW1 4.3 us  
PW2 10.0 us  
PW3 10.0 us  
PI1 1.000 ms  
PI2 1.000 ms  
PI3 1.00 ms  
ACQTM 1.081 sec  
PD 6.000 sec  
SLVNT TCLE  
CTEMP 22.9 c  
RGAIN 30  
BF 1.50 Hz  
EXREF 73.70 ppm  
TMSP 21241

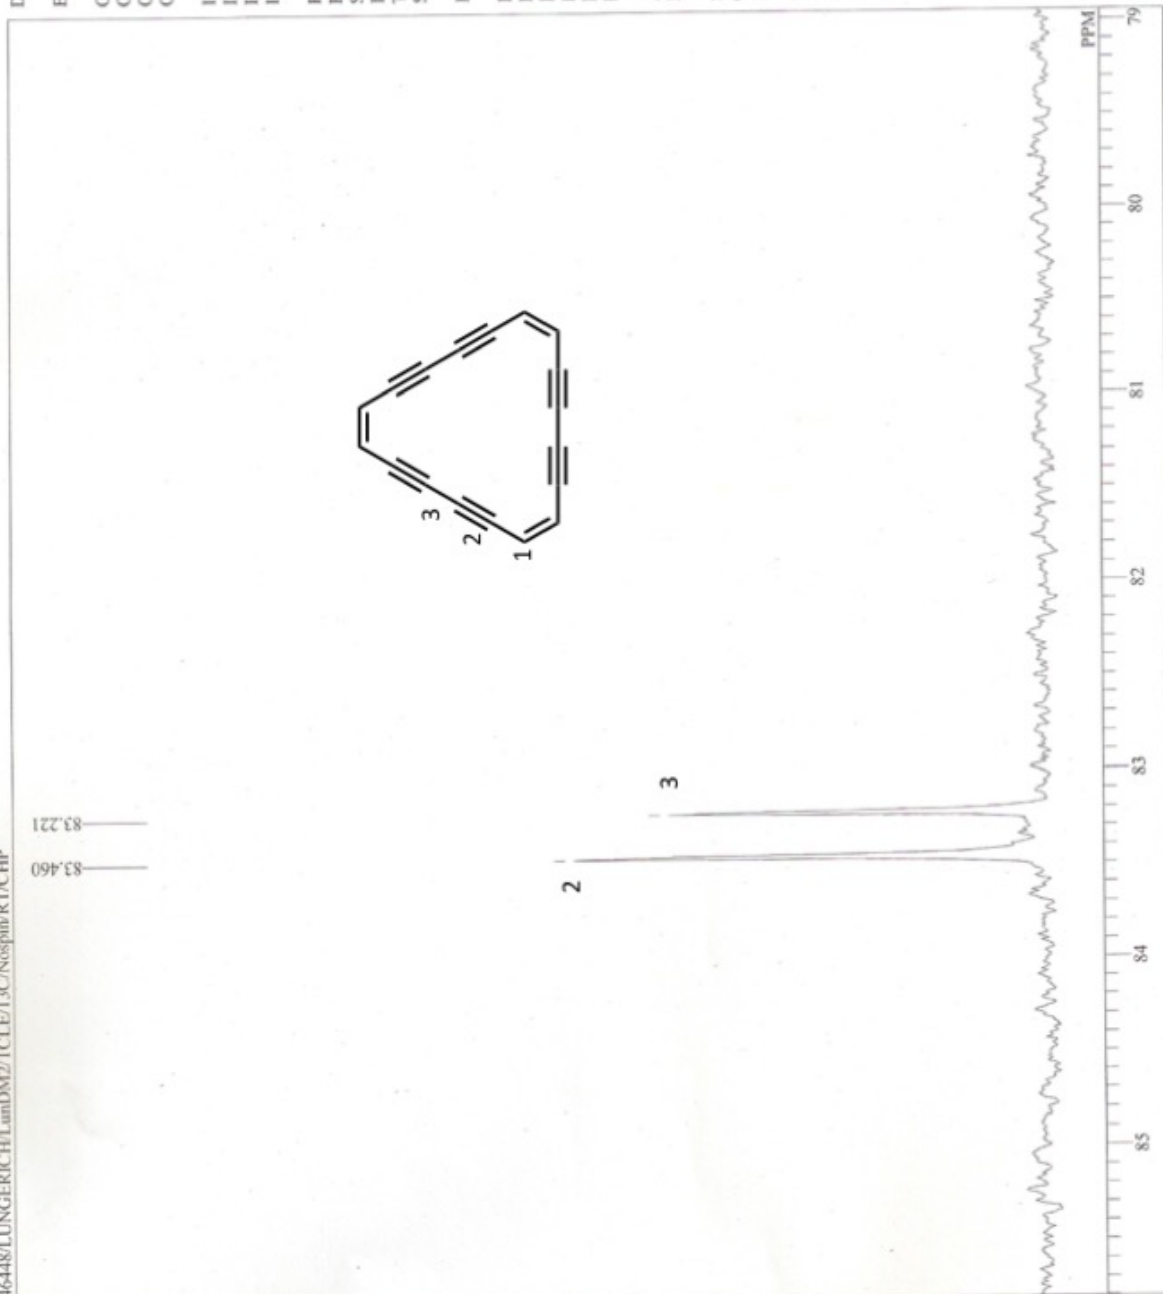

Fig. S9 Zoom-in of  $^{13}\text{C}$  NMR of **5** in  $\text{C}_2\text{D}_2\text{Cl}_4$  at rt (100 MHz).



# Display Report

**Analysis Info**  
Analysis Name: D:\Data\Jux-2015-Lungerich-DL-18-A6-.d  
Method: APPI-Klei-Meinhardt-.m  
Sample Name: Tol  
Comment: Tol  
Acquisition Date: 4/17/2015 12:06:28 PM  
Operator: MD  
Instrument: maXis 4G  
20183

**Acquisition Parameter**  
Source Type: APPI  
Focus: Not active  
Scan Begin: 100 m/z  
Scan End: 1000 m/z  
Ion Polarity: Positive  
Set Capillary: 600 V  
Set End Plate Offset: -500 V  
Set Collision Cell RF: 1000.0 Vpp  
Nebulizer: 3.0 Bar  
Set Dry Heater: 200 °C  
Set Dry Gas: 3.0 l/min  
Set Divert Valve: Waste

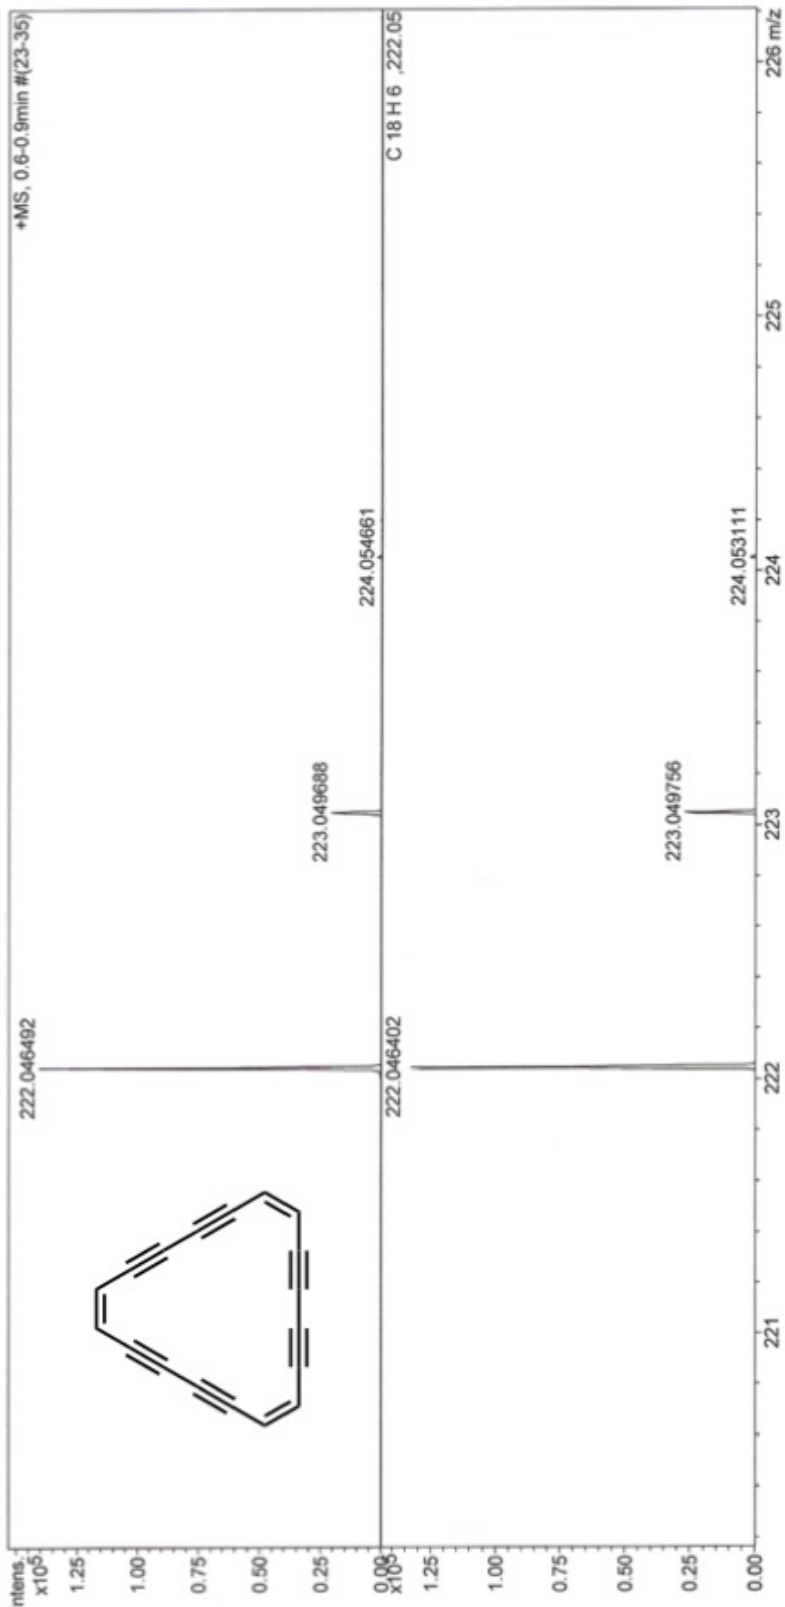

Fig. S10 HRMS of 5 (APPI, toluene).

C:\WINNMR98\Data\umd46449h.ALS  
 #46449/LUNGERICH.LumDDL-M2-2\TCLE\1H\Nospin\RT/CHP

DATIM Fri Nov 06 11:42:25 2015

|       |             |
|-------|-------------|
| EXMOD | NON         |
| OBNUC | 1H          |
| OFR   | 400.05 MHz  |
| OBSET | 129.10 KHz  |
| OBFIN | 3738.5 Hz   |
| IRNUC | 1H          |
| IFR   | 400.05 MHz  |
| IRSET | 120.00 KHz  |
| IRFIN | 106000.0 Hz |
| FREQU | 8000.0 Hz   |
| POINT | 65536       |
| SAMPO | 32768       |
| DUMMY | 8           |
| TIMES | 56          |
| SCANS | 48          |
| RESOL | 0.12 Hz     |
| PW1   | 10.0 us     |
| PW2   | 10.0 us     |
| PW3   | 10.0 us     |
| PI1   | 1.000 ms    |
| PI2   | 1.000 ms    |
| PI3   | 1.00 ms     |
| ACQTM | 4.096 sec   |
| PD    | 4.000 sec   |
| TCLE  | 21.9 c      |
| RGAIN | 16          |
| BF    | 0.12 Hz     |
| EXREF | 5.98 ppm    |
| TMSP  | 44330       |

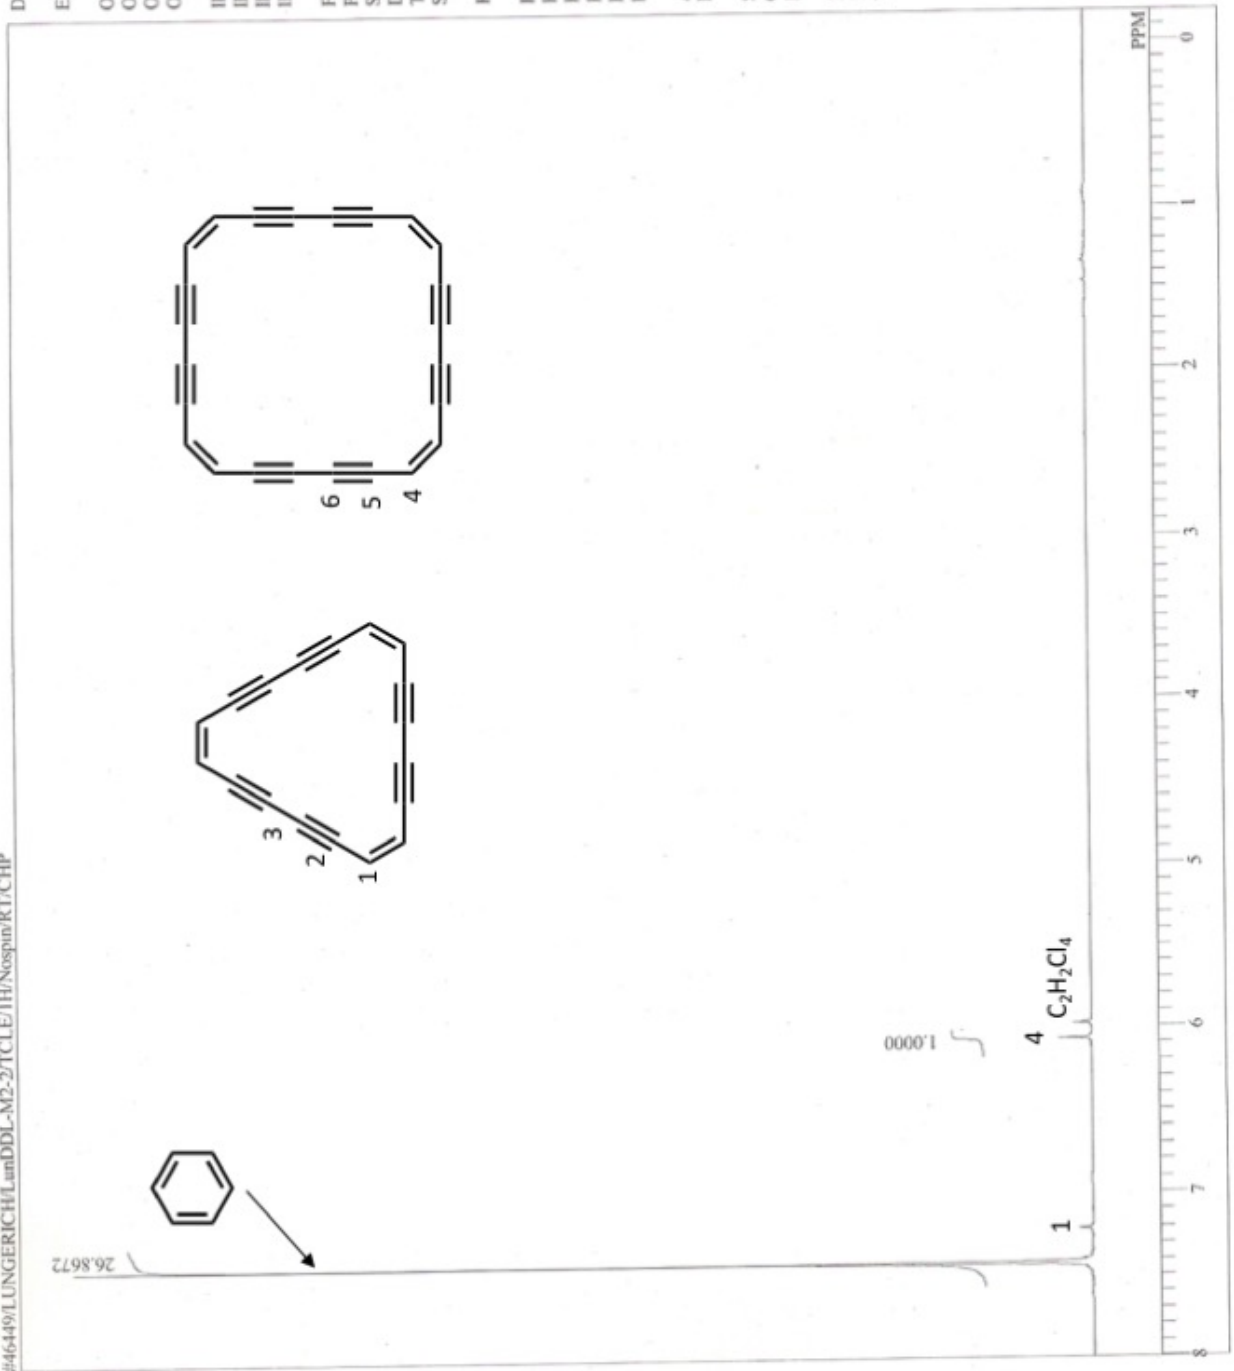

Fig. S11 Comparison of <sup>1</sup>H NMR of 5 and cyclic tetramer in C<sub>2</sub>D<sub>2</sub>Cl<sub>4</sub> at rt (400 MHz).

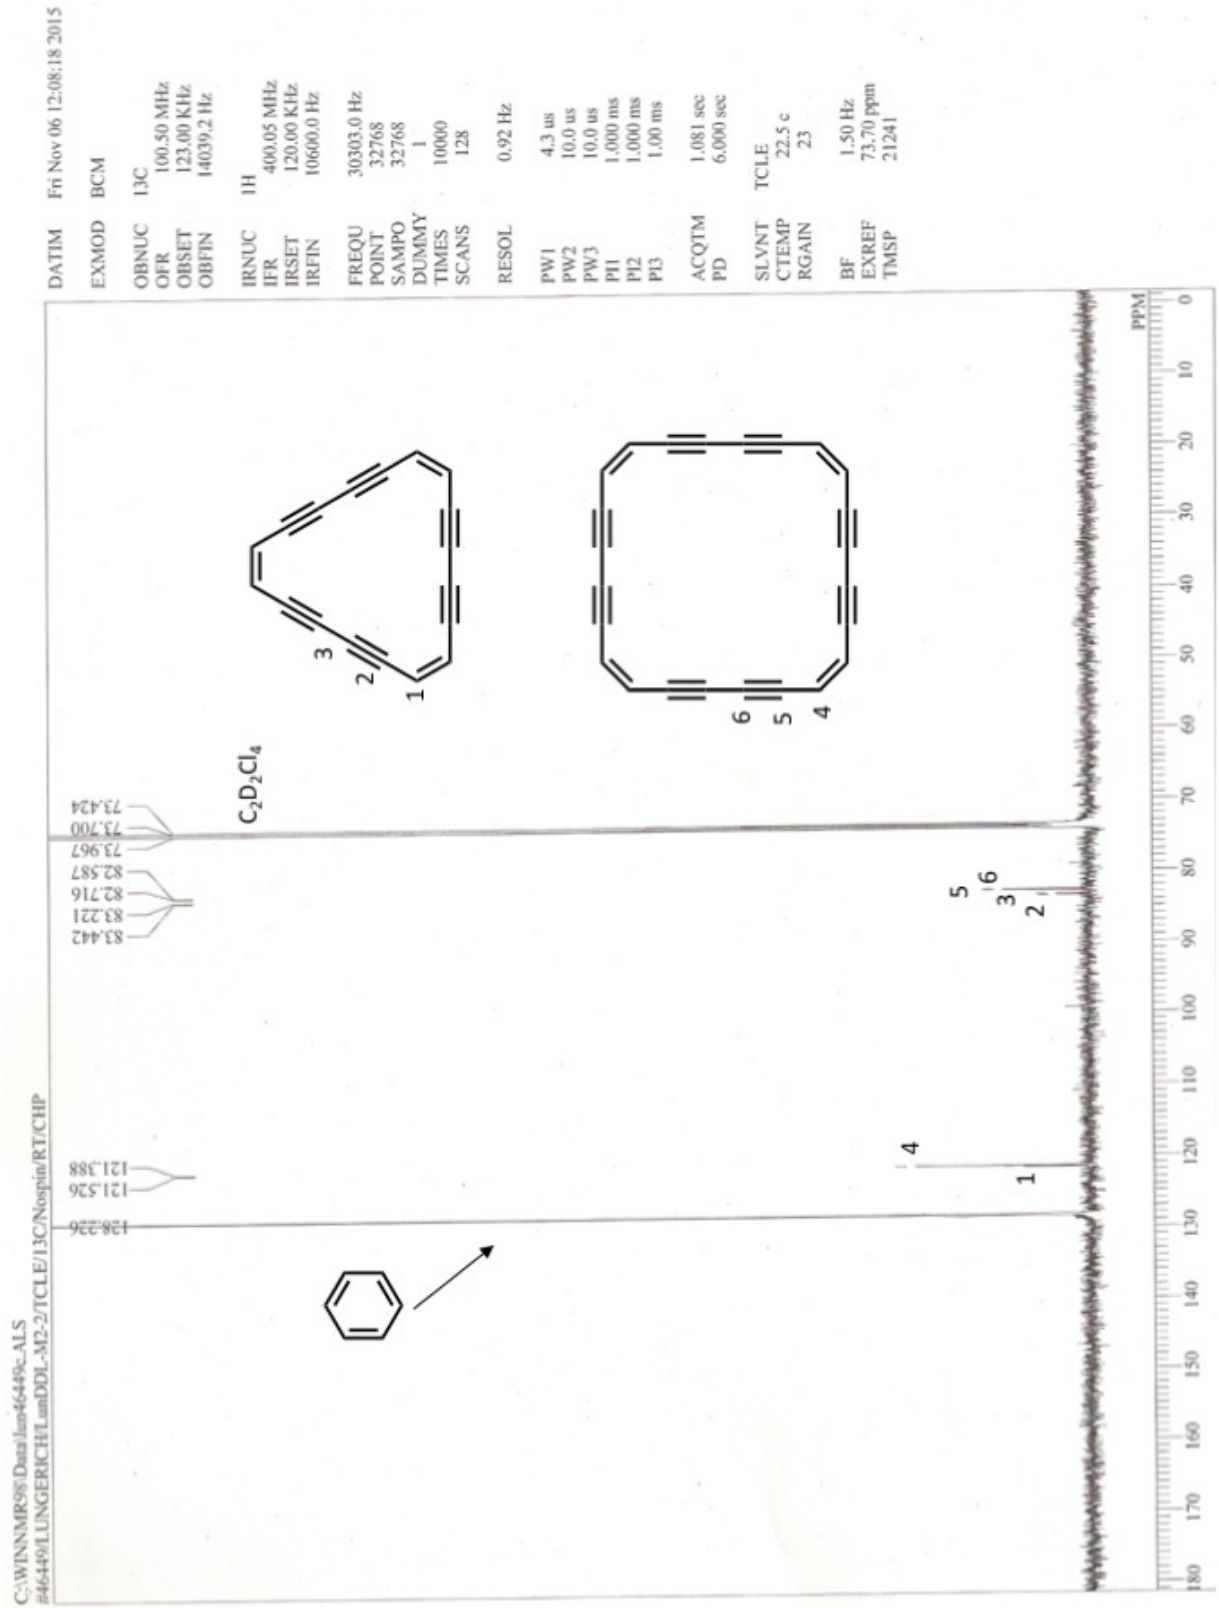

Fig. S12 Comparison of  $^{13}C$  NMR of 5 and cyclic tetramer in  $C_2D_2Cl_4$  at rt (100 MHz).

MIR98:Data\lum6448c-ALS  
91LUNGERICH\lumDDL-M2-2\TCLC/13C\Nospin/RT/CHP

DATIM Fri Nov 06 12:08:18 2015

EXMOD BCM

OBNUC 13C  
OFR 100.50 MHz  
OBSET 123.00 KHz  
OBFIN 14039.2 Hz

IRNUC 1H  
IRF 400.05 MHz  
IRSET 120.00 KHz  
IRFIN 106000.0 Hz

FREQU 30303.0 Hz  
POINT -32768  
SAMPO 32768  
DUMMY 1  
TIMES 10000  
SCANS 128

RESOL 0.92 Hz

PW1 4.3 us  
PW2 10.0 us  
PW3 10.0 us  
PI1 1.000 ms  
PI2 1.000 ms  
PI3 1.00 ms

ACQTM 1.081 sec  
PD 6.000 sec

SLVNT  
CTEMP 22.5 c  
RGAIN 23

BF 1.50 Hz  
EXREF 73.70 ppm  
TMSP 21241

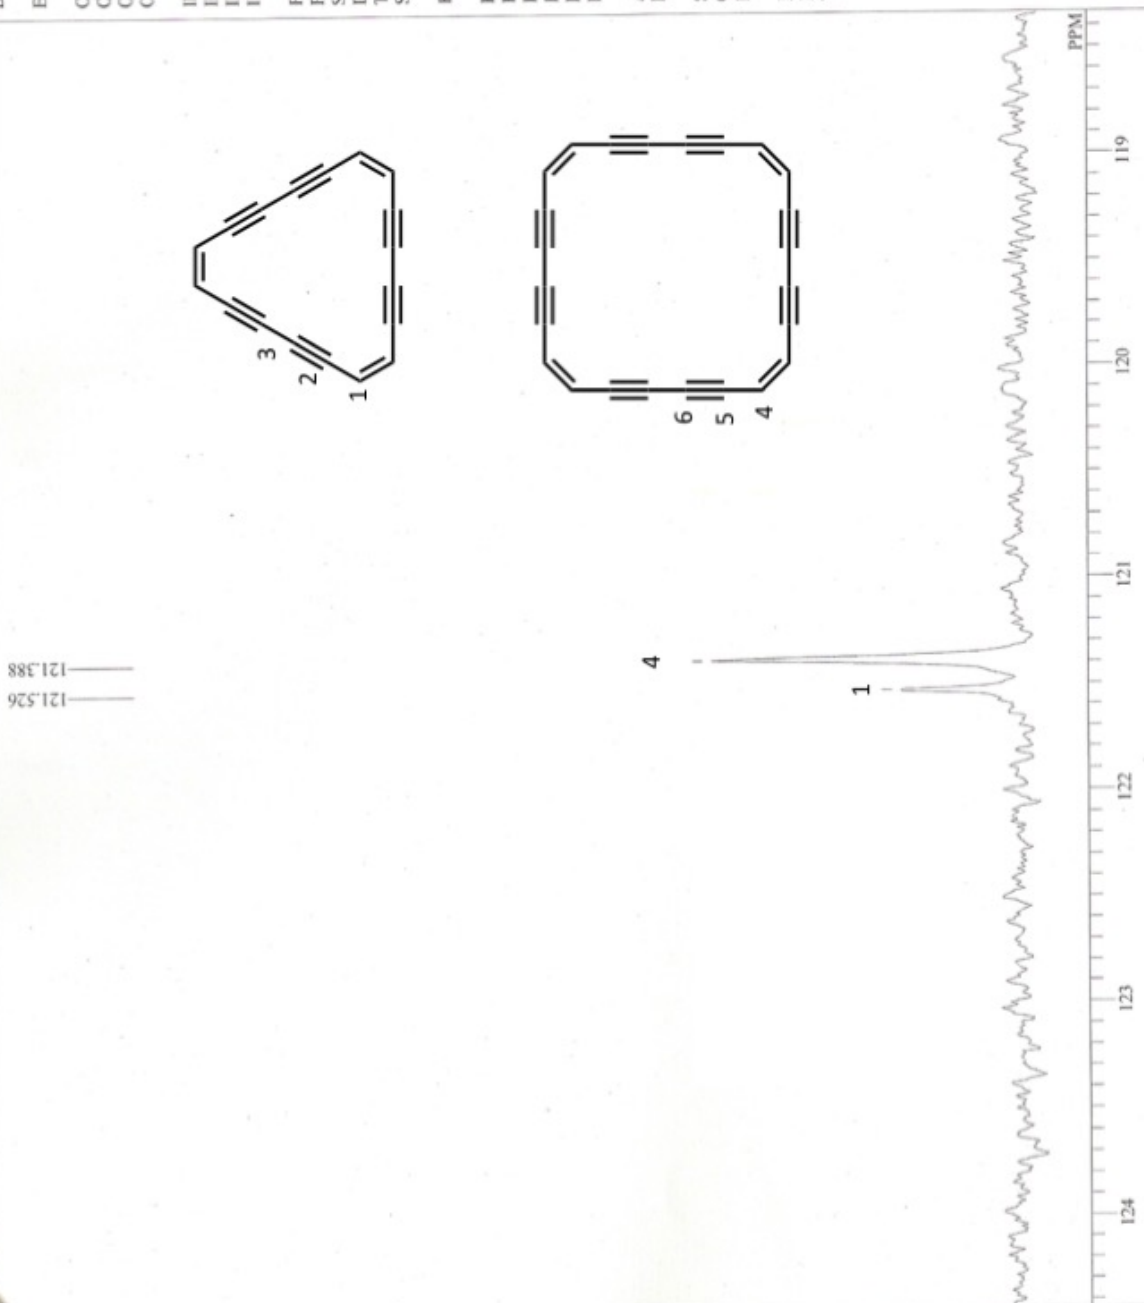

Fig. S13 Zoom-in of comparison of <sup>13</sup>C NMR of **5** and cyclic tetramer in C<sub>2</sub>D<sub>2</sub>Cl<sub>4</sub> at rt (100 MHz).

NMR981>Data\lum46449c-ALS  
449/LUNGERICH/LumDDL-M2-2/TCLE/13C/Nospin/RT/CHP

DA:TIM Fri Nov 06 12:08:18 2015

EXMOD BCM

OBNUC 13C  
OFR 100.50 MHz  
OBSET 123.00 KHz  
OBFIN 14039.2 Hz

IRNUC 1H  
IFR 400.05 MHz  
IRSET 120.00 KHz  
IRFIN 10600.0 Hz

FREQU 30303.0 Hz  
POINT 32768  
SAMPO 32768  
DUMMY 1  
TIMES 10000  
SCANS 128

RESOL 0.92 Hz

PW1 4.3 us  
PW2 10.0 us  
PW3 10.0 us  
PI1 1.000 ms  
PI2 1.000 ms  
PI3 1.00 ms

ACQTM 1.081 sec  
PD 6.000 sec

SLVNT TCLE  
CTEMP 22.5 c  
RGAIN 23

BF 1.50 Hz  
EXREF 73.70 ppm  
TMSP 21241

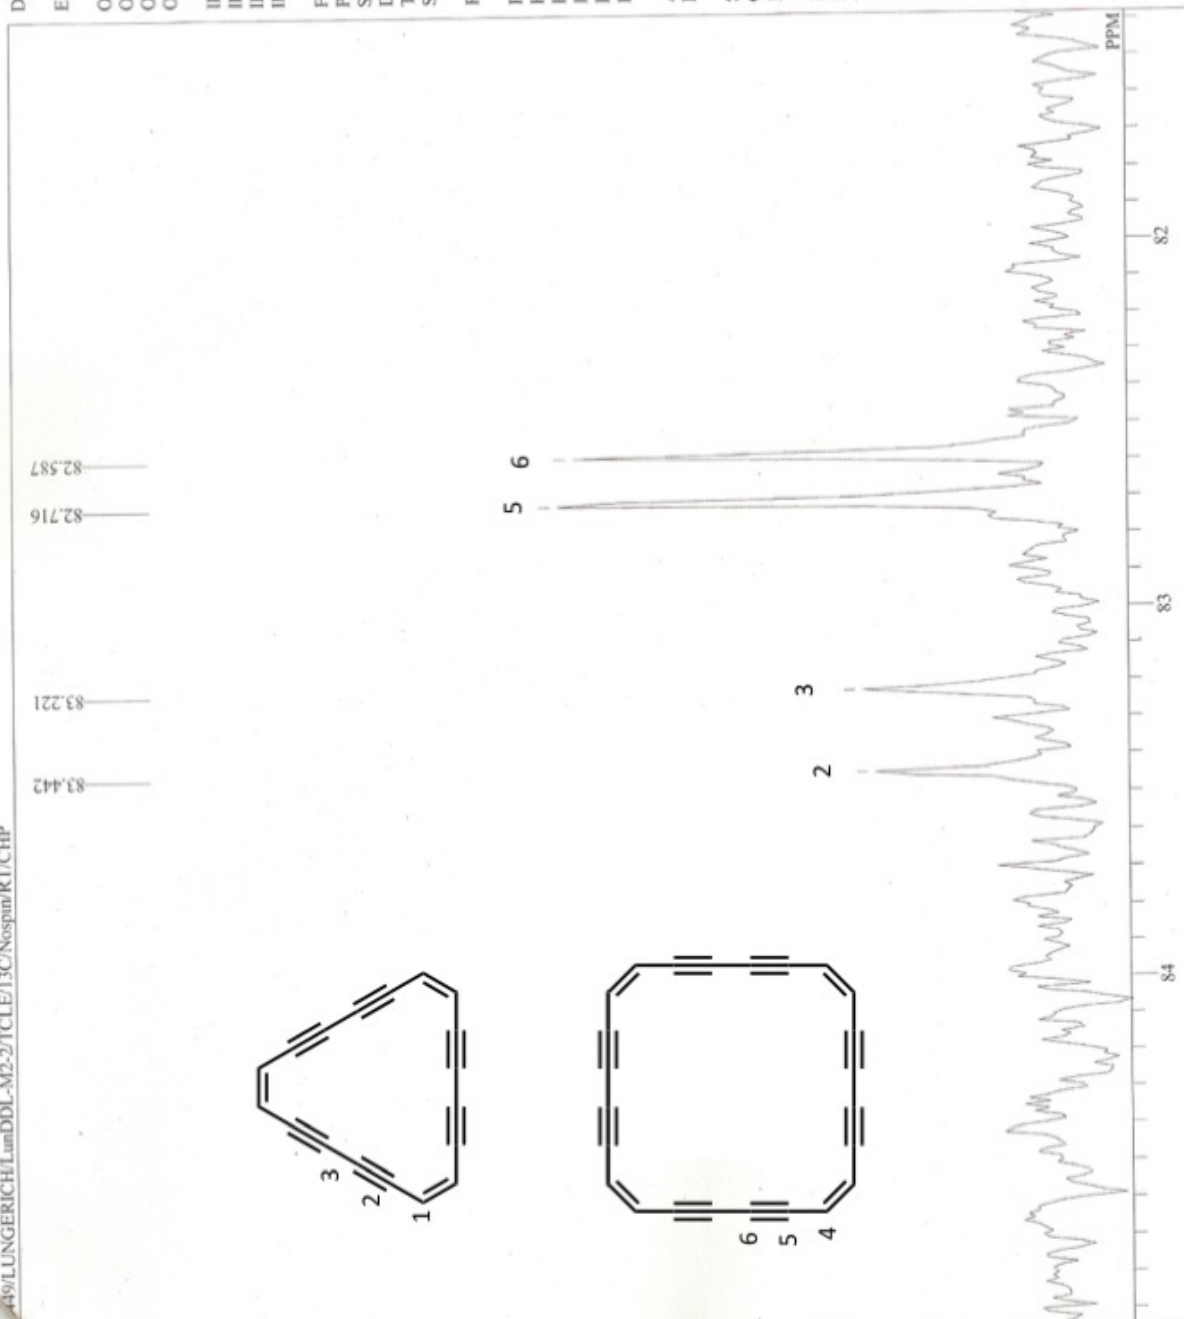

Fig. 14 Zoom-in of comparison of <sup>13</sup>C NMR of 5 and cyclic tetramer in C<sub>2</sub>D<sub>2</sub>Cl<sub>4</sub> at rt (100 MHz).

# Display Report

|                      |                                             |                  |                      |
|----------------------|---------------------------------------------|------------------|----------------------|
| <b>Analysis Info</b> |                                             | Acquisition Date | 11/5/2015 3:09:39 PM |
| Analysis Name        | D:\Data\Jux-2015-Lungerich-DL-M-2-2-appi-.d | Operator         | MD                   |
| Method               | APPI-kleine-Massen-ab-100-.m                | Instrument       | maxis 4G             |
| Sample Name          |                                             |                  | 20183                |
| Comment              | MeOH                                        |                  |                      |

|                              |            |                       |            |
|------------------------------|------------|-----------------------|------------|
| <b>Acquisition Parameter</b> |            | Set Nebulizer         | 3.0 Bar    |
| Source Type                  | APPI       | Set Dry Heater        | 200 °C     |
| Focus                        | Not active | Set Dry Gas           | 2.0 l/min  |
| Scan Begin                   | 100 m/z    | Set Divert Valve      | Waste      |
| Scan End                     | 1400 m/z   |                       |            |
|                              |            | Ion Polarity          | Positive   |
|                              |            | Set Capillary         | 800 V      |
|                              |            | Set End Plate Offset  | -500 V     |
|                              |            | Set Collision Cell RF | 2500.0 Vpp |

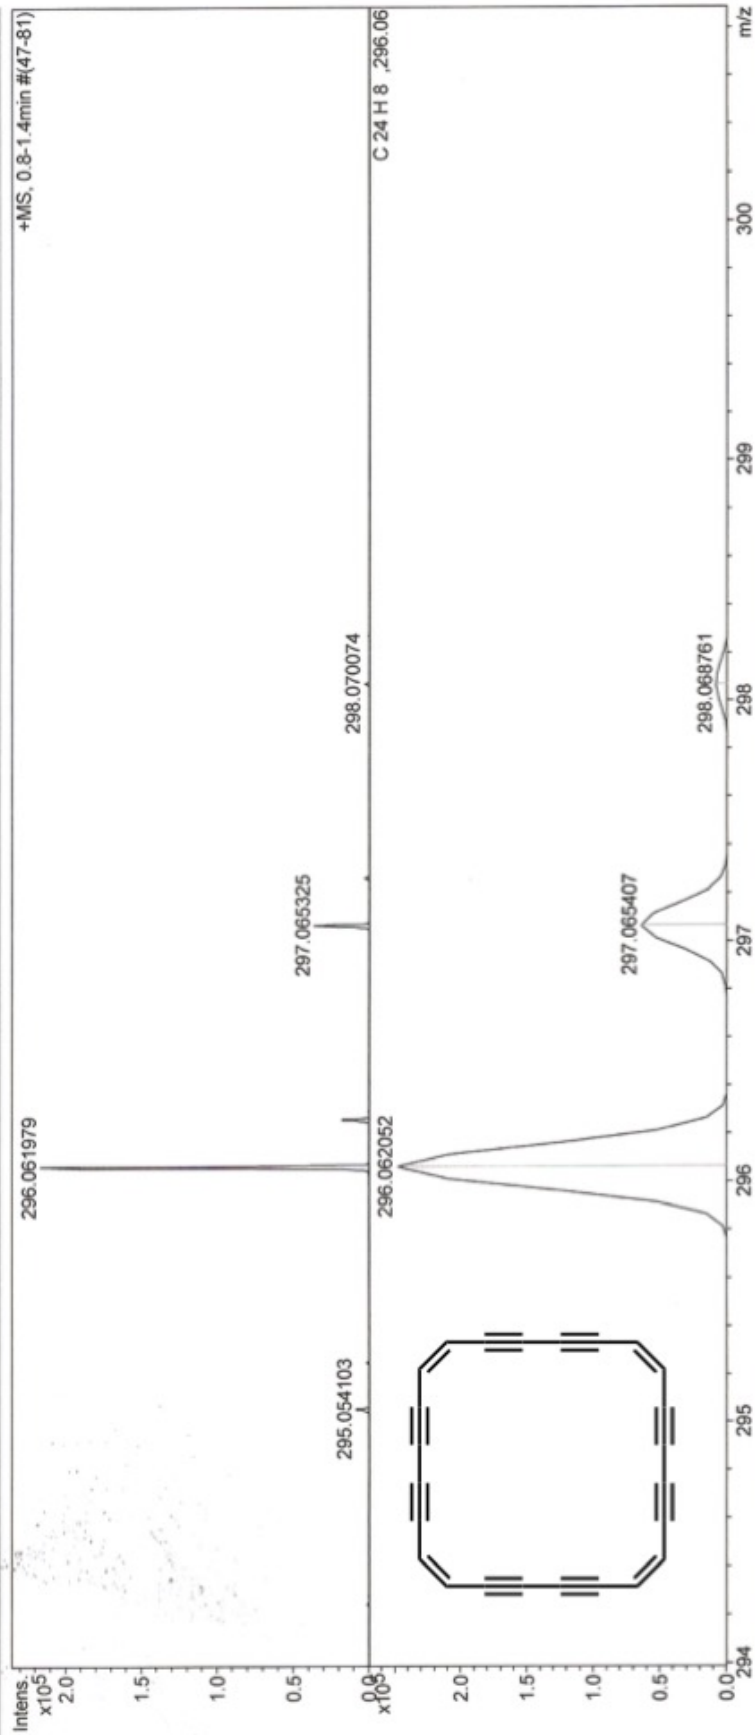

Fig. S15 HRMS of cyclic tetramer (APPI, MeOH).

104265/Lungerich/Lund M-3 sublimierte Kristalle/3mg/1H/THF-d8/25DEG/Maid

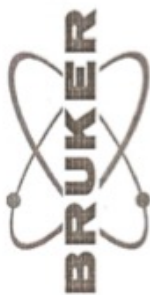

Current Data Parameters  
NAME 41u104265  
EXPNO 1  
PROCNO 1

F2 - Acquisition Parameters  
Date\_ 20151218  
Time 13.06  
INSTRUM spect  
PROBHD 5 mm PABBO BB-  
PULPROG zg30  
TD 65536  
SOLVENT THF  
NS 32  
DS 2  
SWH 8278.146 Hz  
FIDRES 0.126314 Hz  
AQ 3.9583745 sec  
RG 228.1  
DW 60.400 usec  
DE 9.00 usec  
TE 298.4 K  
D1 2.00000000 sec  
TDO 1

==== CHANNEL f1 =====  
NUC1 1H  
P1 12.13 usec  
PL1 0 dB  
SFO1 400.1324710 MHz

F2 - Processing parameters  
SI 32768  
SF 400.1300143 MHz  
WDW EM  
SSB 0  
LB 0.30 Hz  
GB 0  
PC 1.00

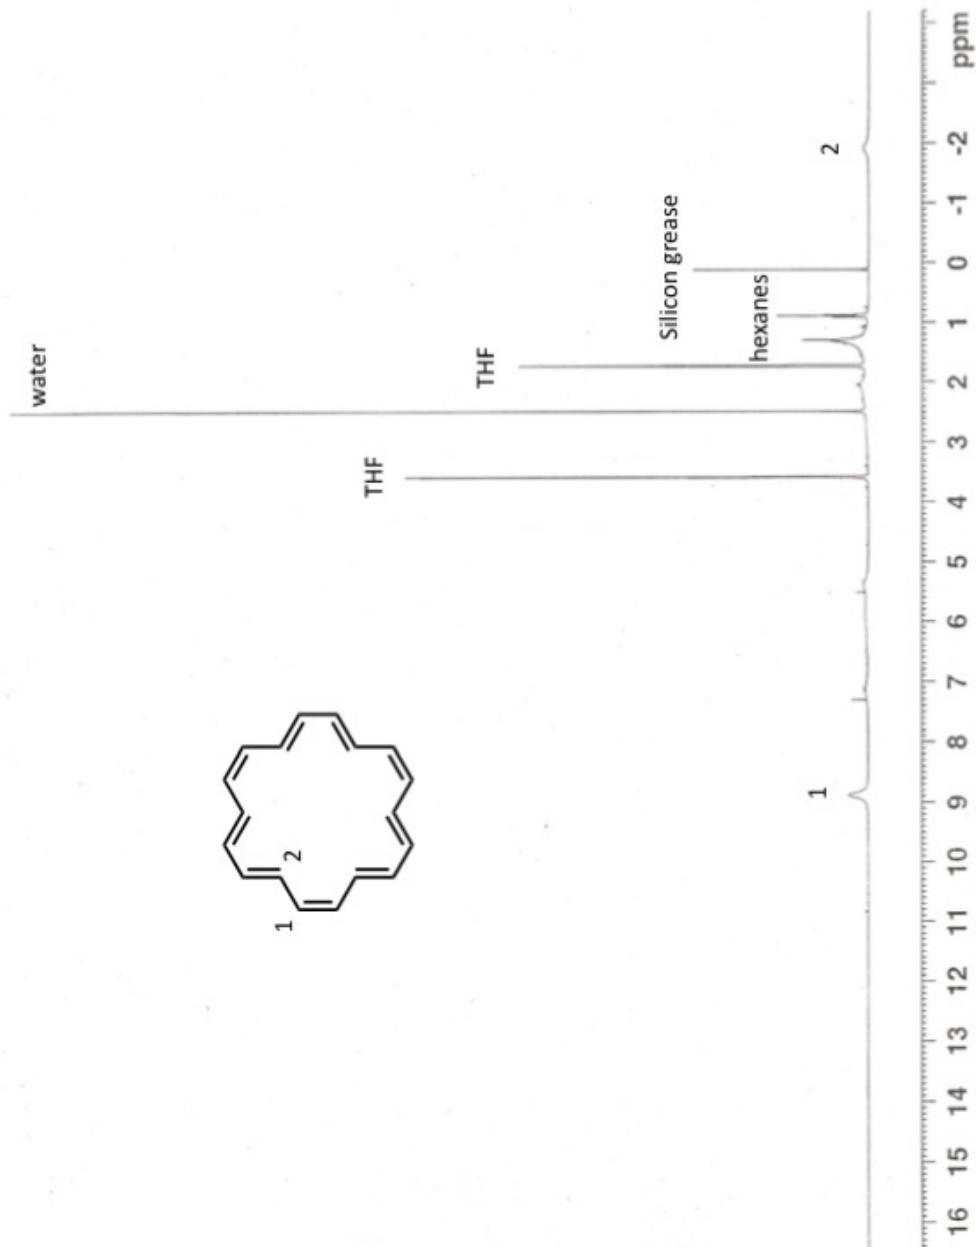

Fig. S16  $^1\text{H}$  NMR of sublimed **1** in THF- $\text{D}_8$  at rt (400 MHz); crystals were carefully washed with hexanes,  $\text{CH}_2\text{Cl}_2$ , benzene and dried under  $\text{N}_2$ -flow.

104265/Lungerich/Lund M-3 sublimierte Kristalle/3mg/1H/THF-d8/25DEG/Maid

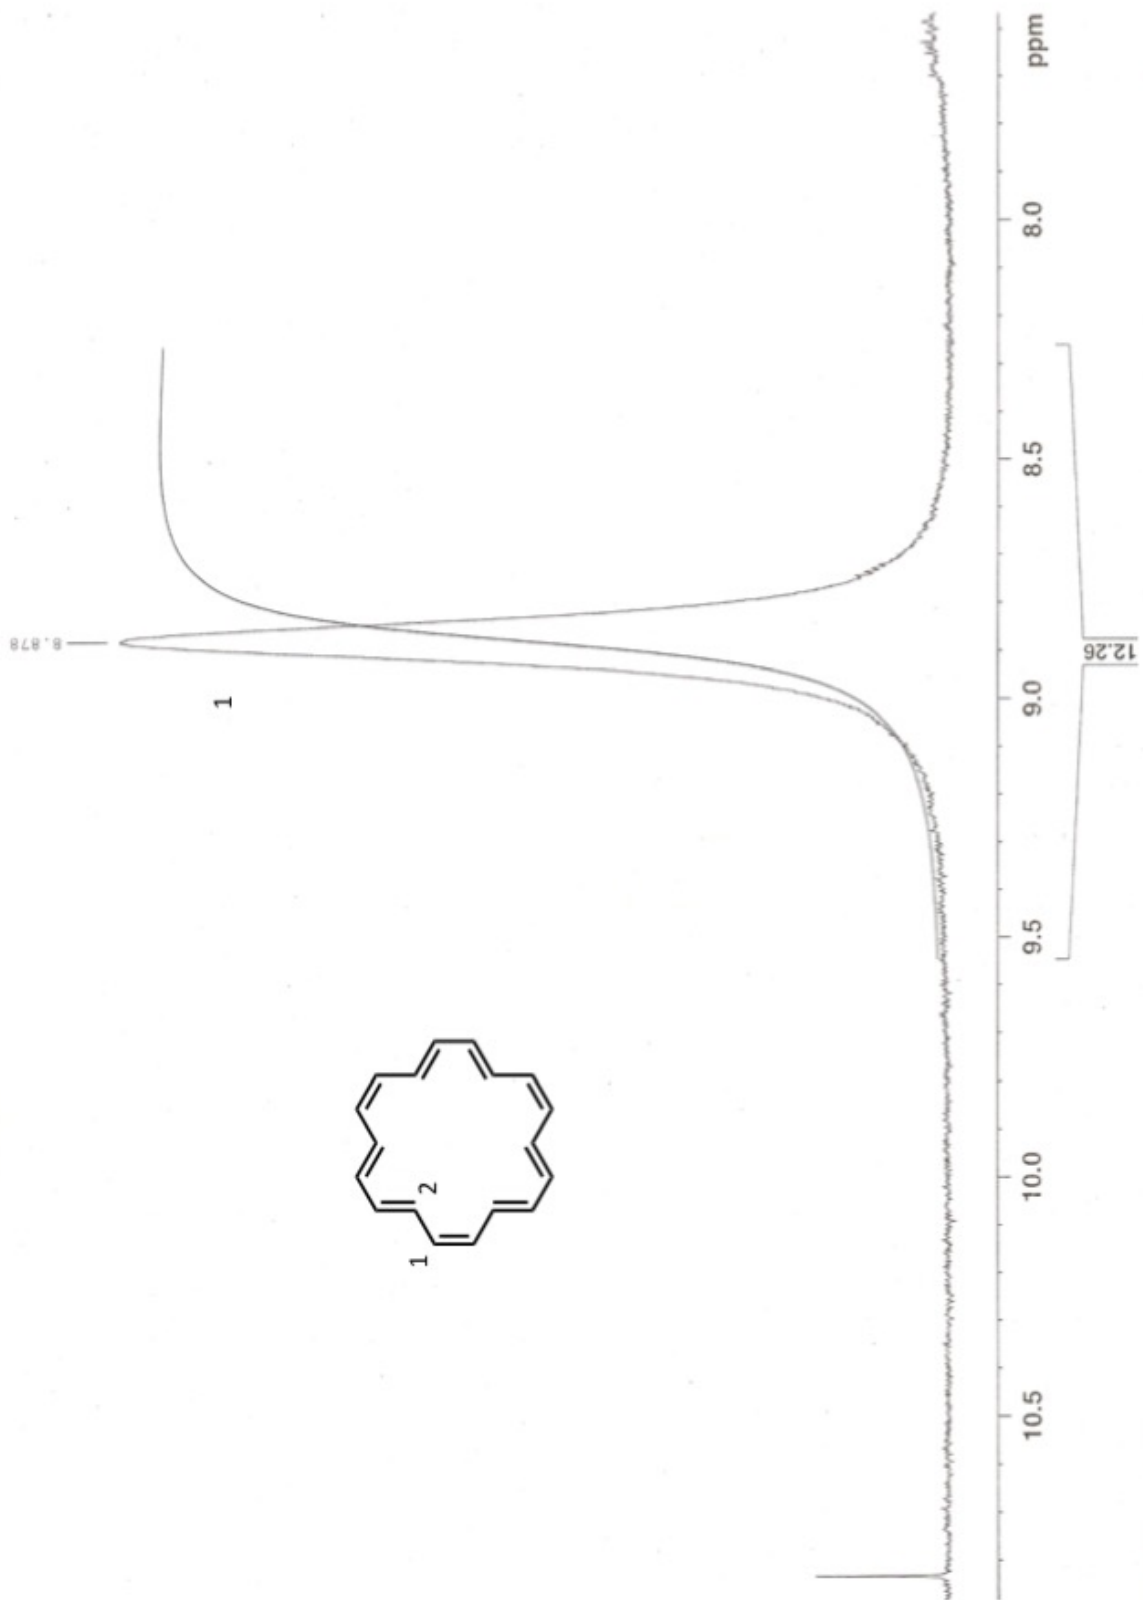

Fig. S17 Zoom-in of  $^1\text{H}$  NMR of **1** in THF- $\text{D}_8$  at rt (400 MHz).



104265/Lungerich/Lund M-3 sublimierte Kristalle/3mg/1H/THF-d8/25DEG/Maid

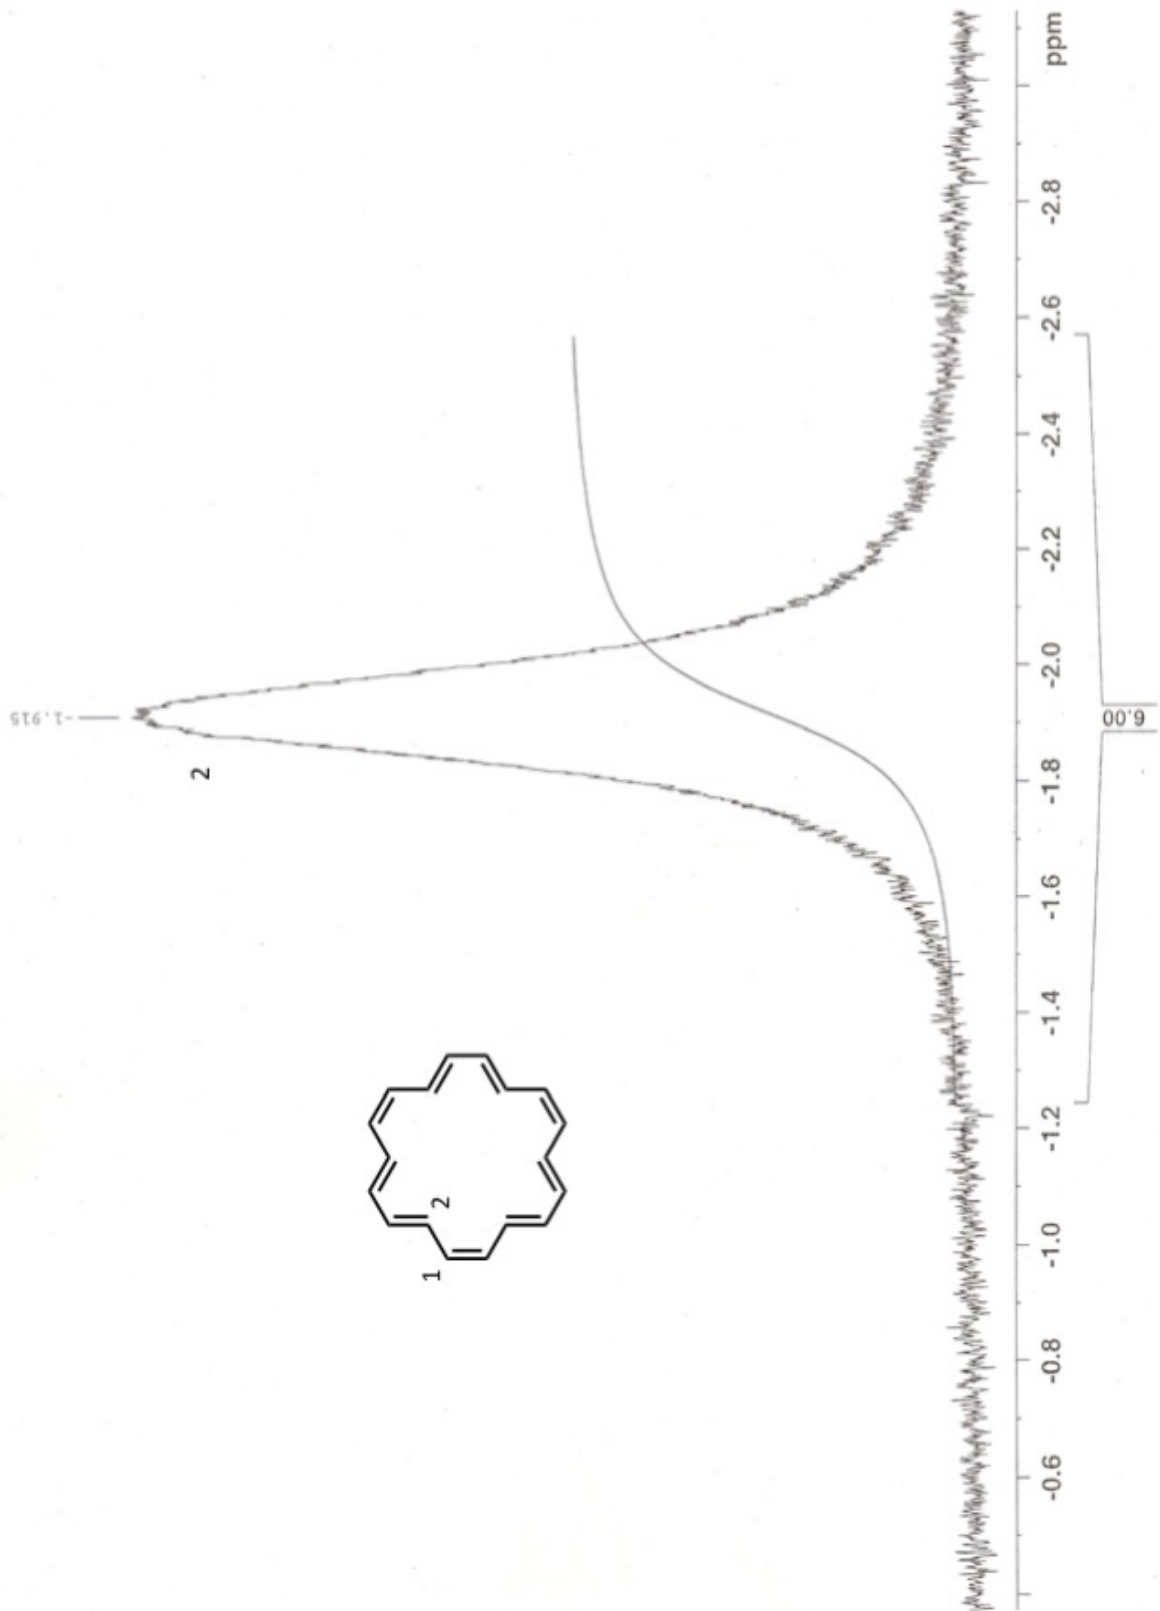

Fig. S18 Zoom-in of  $^1\text{H}$  NMR of **1** in THF- $\text{D}_8$  at rt (400 MHz).

104130TLungerich/LunD-M3/11mg/1H/THF-d8/-40DEG/Maid

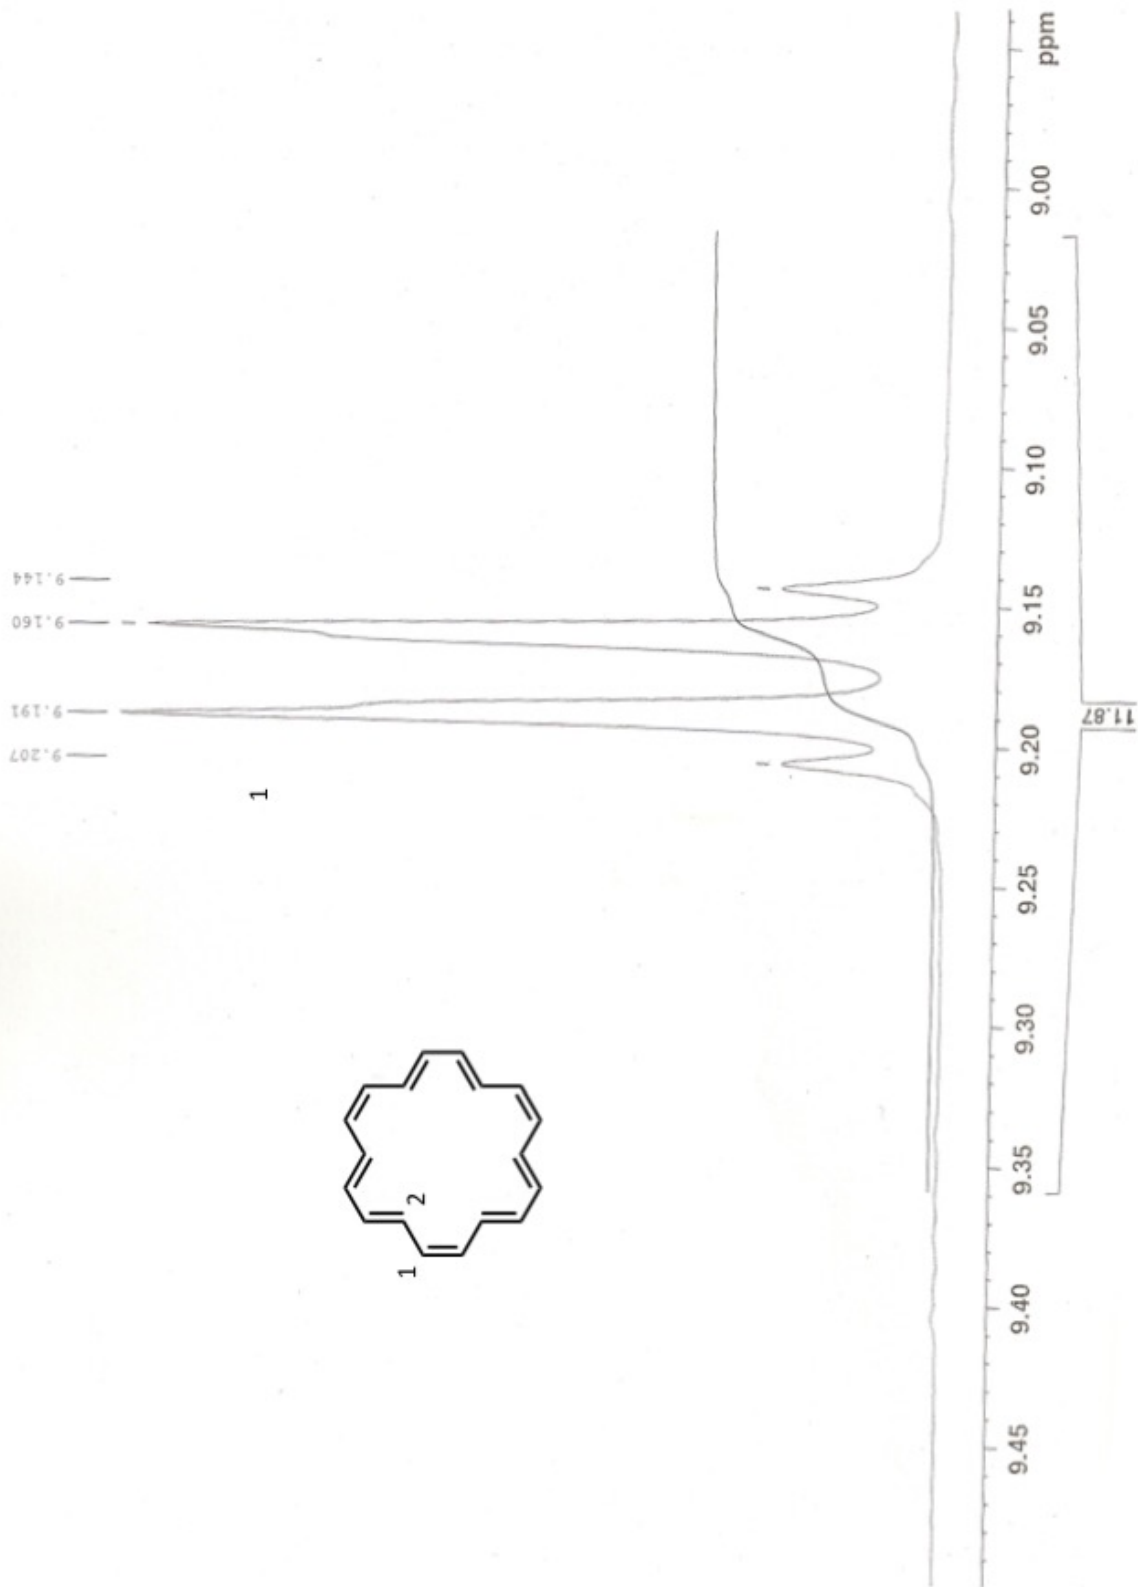

Fig. S19 Zoom-in of  $^1\text{H}$  NMR of **1** in THF- $\text{D}_8$  at  $-40^\circ\text{C}$  (400 MHz).

104130TLungerich/LunD-M3/11mg/1H/THF-d8/-40DEG/Maid

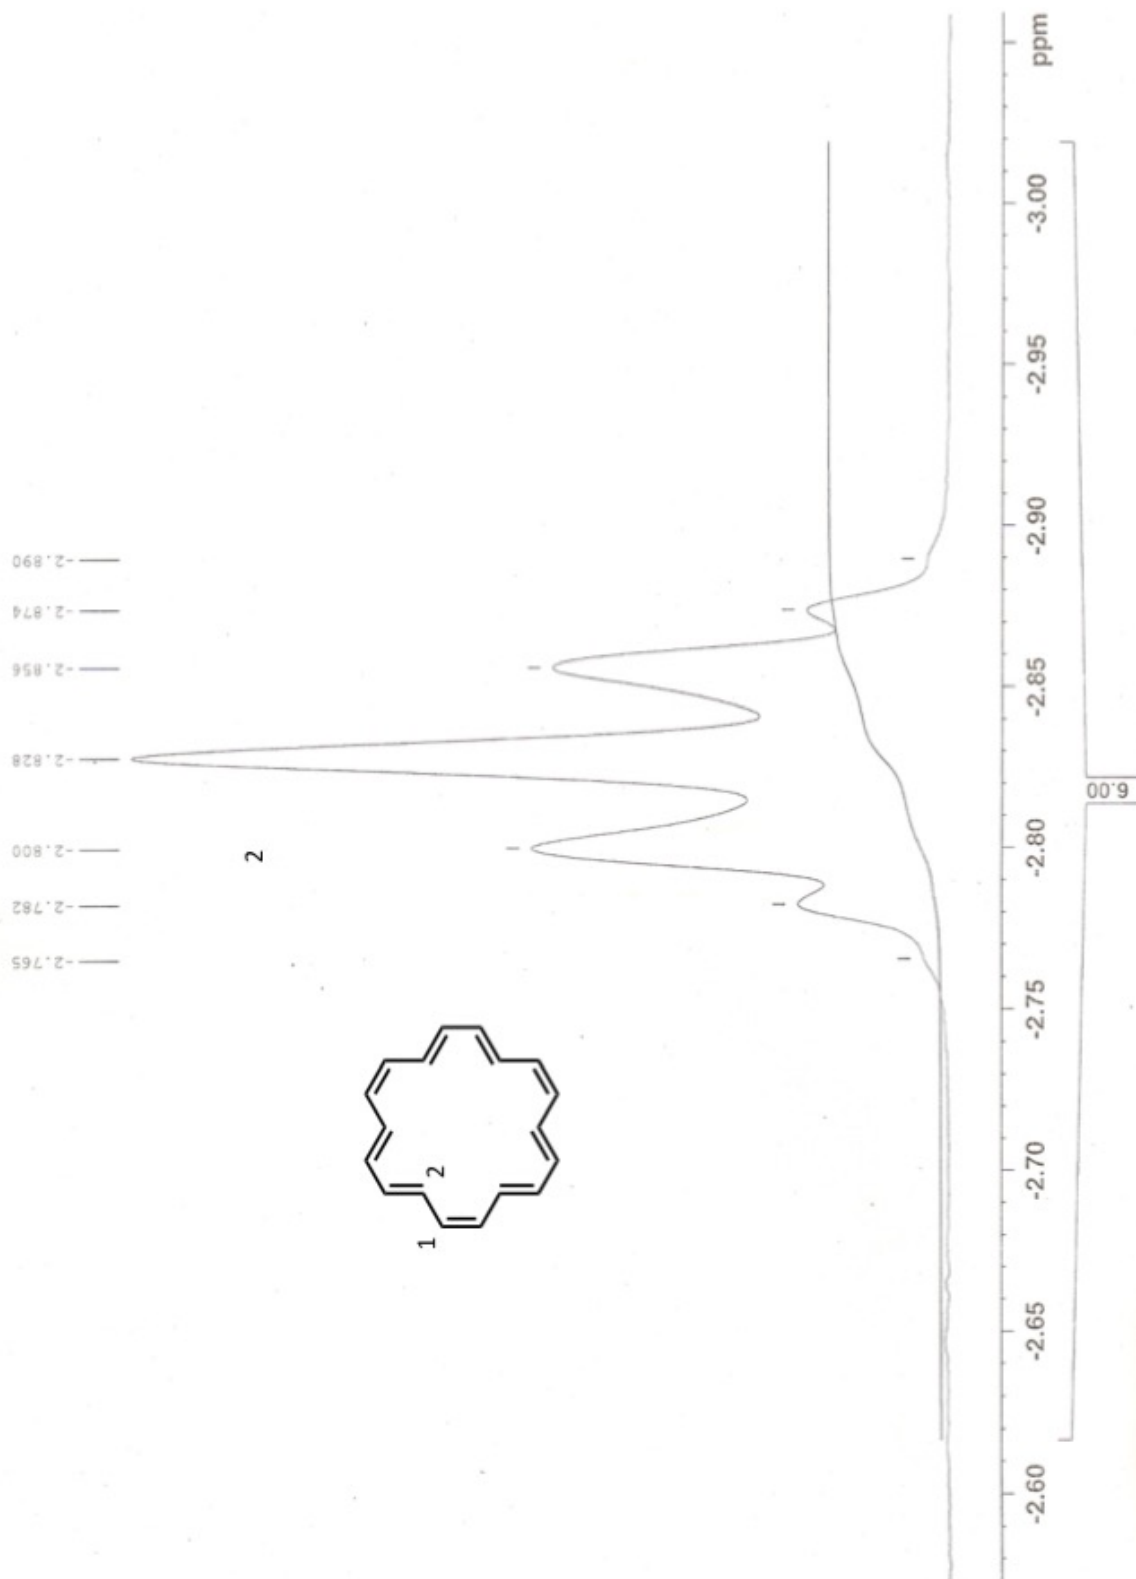

**Fig. S20** Zoom-in of <sup>1</sup>H NMR of **1** in THF-D<sub>8</sub> at -40 °C (400 MHz).

104130TLungerich/LunD-M3/11mg/13C/THF-d8/-40DEG/Maid

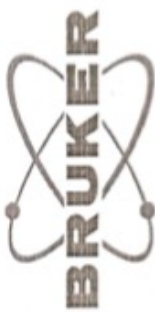

Current Data Parameters  
NAME 4lu104131  
EXPNO 433  
PROCNO 1

F2 - Acquisition Parameters

Date\_ 20151215  
Time 14.26  
INSTRUM spect  
PROBHD 5 mm PABBO BB-  
PULPROG zgpg30  
TD 65536  
SOLVENT THF  
NS 208  
DS 4  
SWH 20080.320 Hz  
FIDRES 0.306401 Hz  
AQ 1.6318464 sec  
RG 46341  
DM 24.900 usec  
DE 9.00 usec  
TE 233.1 K  
D1 4.0000000 sec  
d11 0.0300000 sec  
DELTA 3.9000010 sec  
TD0 1  
SF01 100.6177596 MHz  
NUC1 13C  
P1 7.00 usec  
PLM1 -1.00000000 W  
SF02 400.1316005 MHz  
NUC2 1H  
CFPRG[2] waltz16  
PCPD2 116.00 usec  
PLM2 -1.00000000 W  
PLM12 -1.00000000 W  
PLM13 -1.00000000 W

F2 - Processing parameters  
SI 32768  
SF 100.6126909 MHz  
WDW 0  
SSB 0  
LB 1.00 Hz  
GB 0  
PC 1.40

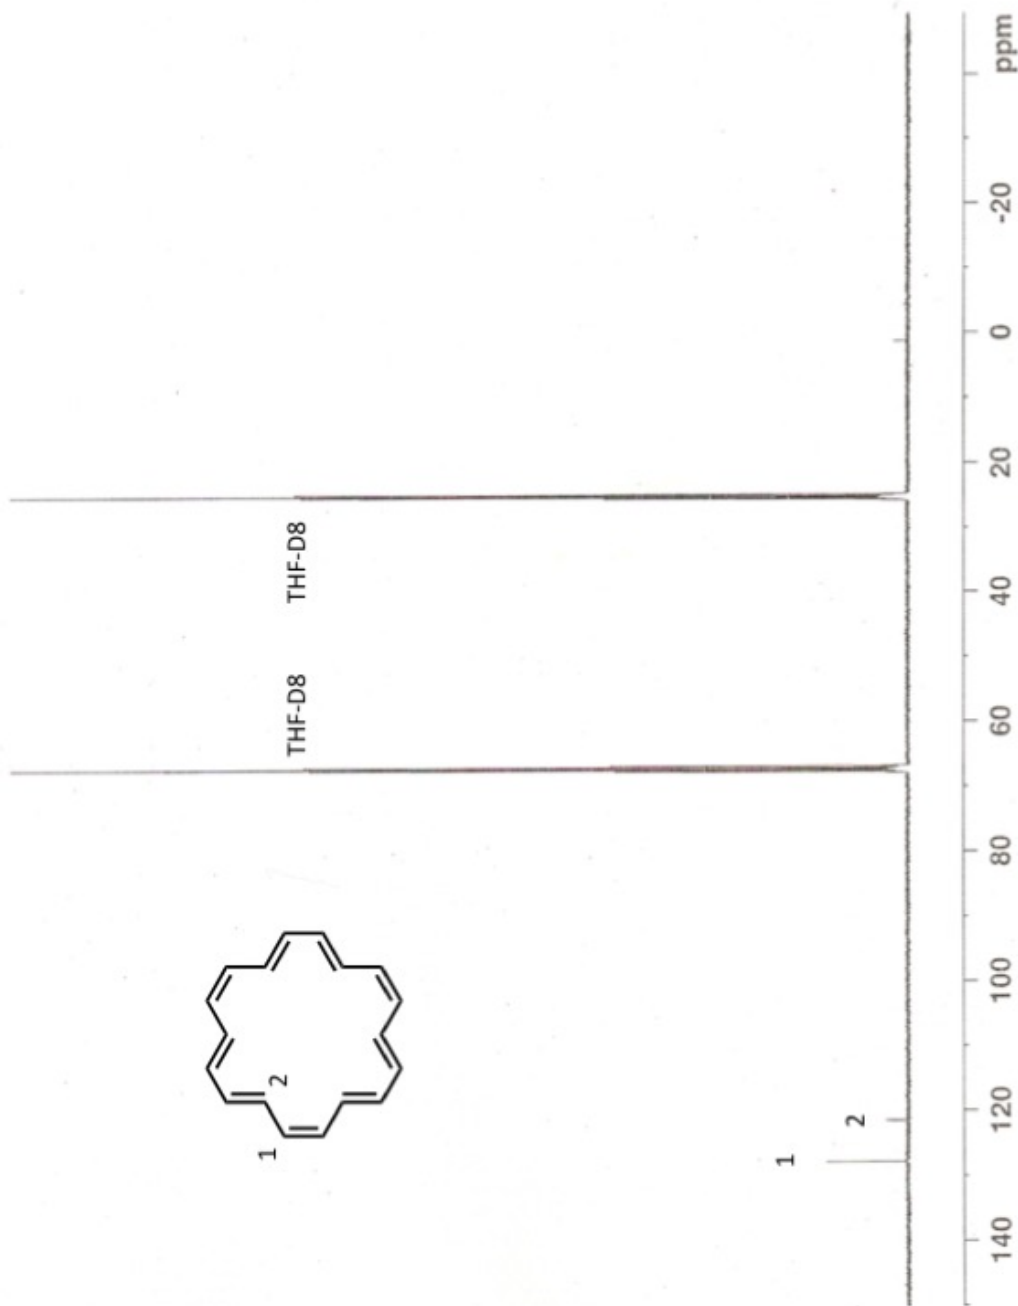

Fig. S21 <sup>13</sup>C NMR of 1 in THF-D<sub>8</sub> at -40 °C (100 MHz).

104130TLungerich/LunD-M3/11mg/<sup>13</sup>C/THF-d8/-40DEG/Maid

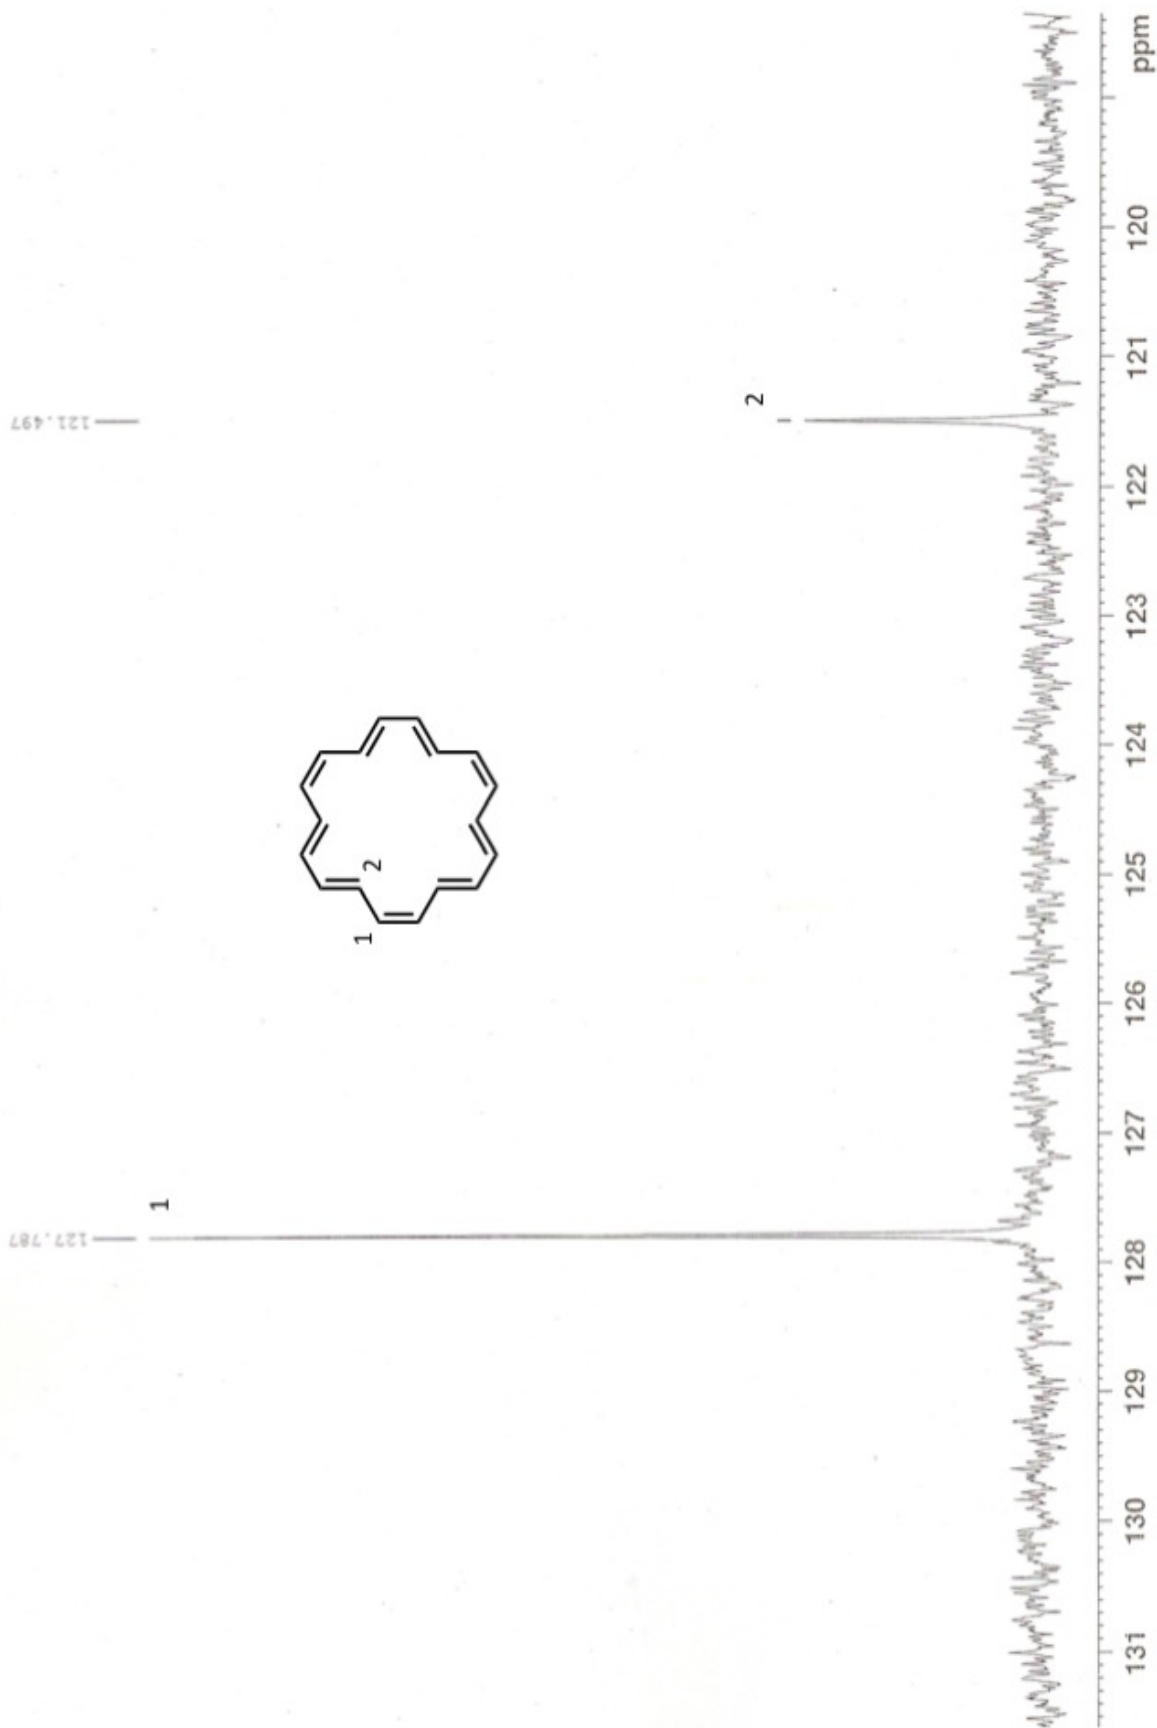

Fig. S22 Zoom-in of <sup>13</sup>C NMR of **1** in THF-D<sub>8</sub> at -40 °C (100 MHz).

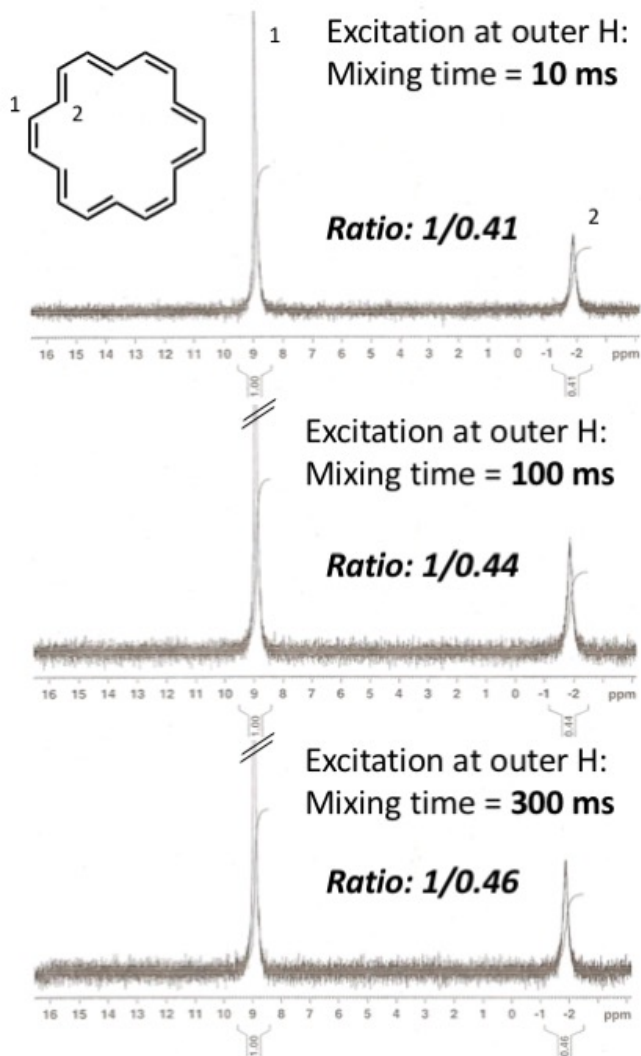

**Fig. S23**  $^1\text{H}$  EXCY-NMR of **1** in  $\text{THF-D}_8$  at rt (400 MHz); different mixing times indicate rapid exchange of inner and outer protons at rt.

# Display Report

**Analysis Info**  
Analysis Name: D:\Data\lux-2016-lungerich-18-a-appi-.d  
Method: APPI-kleine-ab-140-.m  
Sample Name: Tol  
Comment: Tol  
Acquisition Date: 1/22/2016 11:39:43 AM  
Operator: MD  
Instrument: maXis 4G  
20183

## Acquisition Parameter

|             |            |                       |            |                  |           |
|-------------|------------|-----------------------|------------|------------------|-----------|
| Source Type | APPI       | Ion Polarity          | Positive   | Set Nebulizer    | 3.0 Bar   |
| Focus       | Not active | Set Capillary         | 600 V      | Set Dry Heater   | 200 °C    |
| Scan Begin  | 100 m/z    | Set End Plate Offset  | -500 V     | Set Dry Gas      | 3.0 l/min |
| Scan End    | 1000 m/z   | Set Collision Cell RF | 1000.0 Vpp | Set Divert Valve | Waste     |

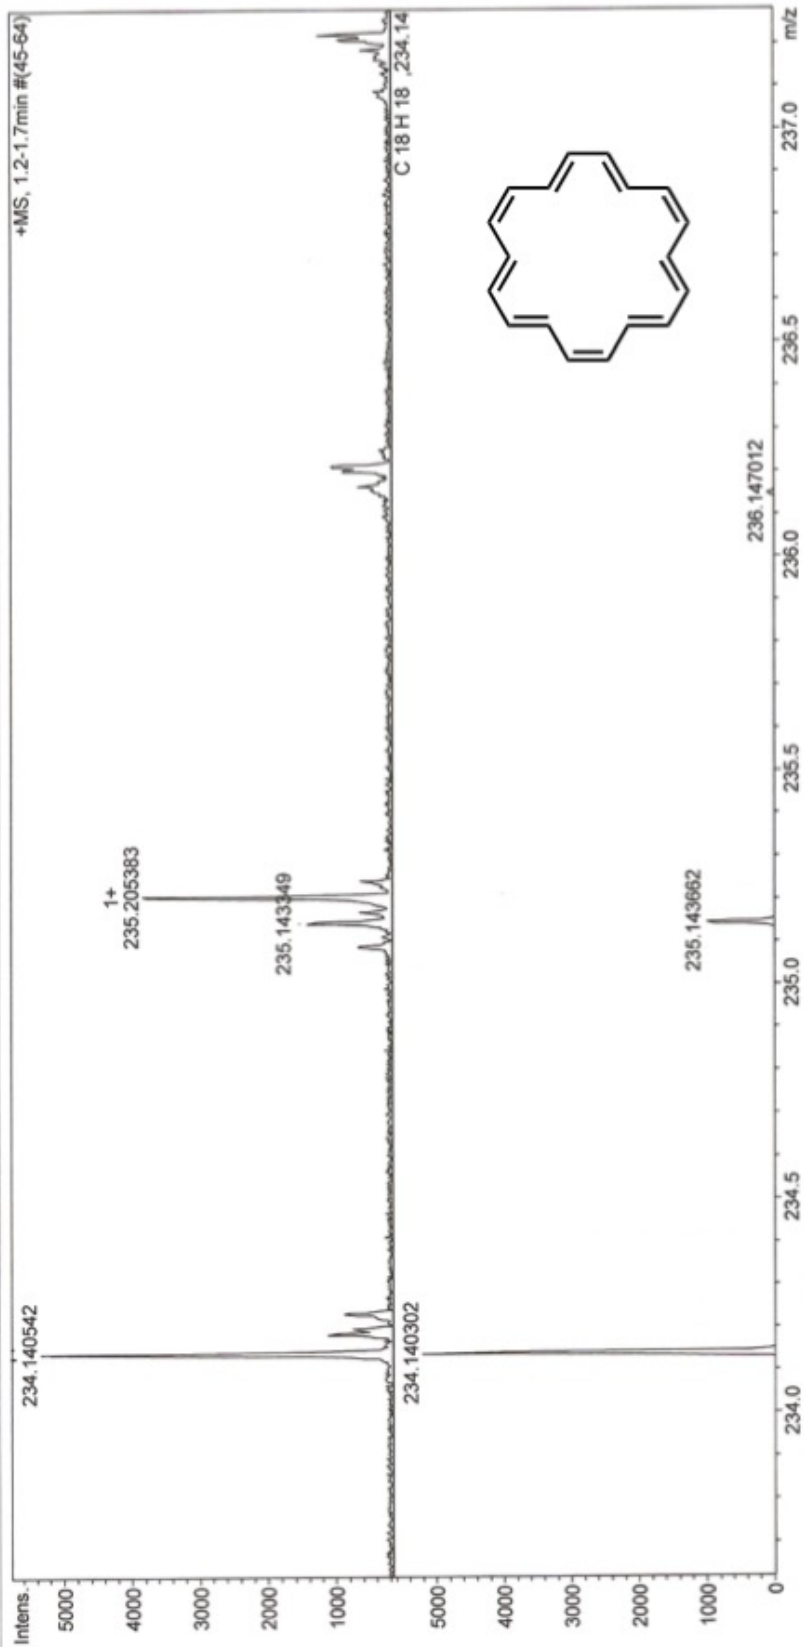

Fig. S24 HRMS of 1 (APPI, toluene).
